# Supplementary material for: Fluorescein-Labeled Thiacalix[4]arenes as Potential Theranostic Molecules: Synthesis, Self-Association, and Antitumor Activity
Source: MDPI journal article supplement (doi:10.3390/pharmaceutics14112340), 2022-10-30
Supplement: s1 [file s1]

## Supplementary Information

For

# Fluorescein-Labeled Thiacalix[4]arenes as Potential Theranostic Molecules: Synthesis, Self-Association, and Antitumor Activity

Alan Akhmedov, Olga Terenteva, Evgenia Subakaeva, Pavel Zelenikhin, Ramilia Shurpik, Dmitriy Shurpik, Pavel Padnya, Ivan Stoikov

## Content

|                                                                                                       |       |
|-------------------------------------------------------------------------------------------------------|-------|
| Characterization of the compounds <b>4a–b</b> , <b>5a–d</b> , <b>6a–d</b>                             | 2–4   |
| Figures S1–S10. <sup>1</sup> H NMR spectra of the compounds <b>4a–b</b> , <b>5a–d</b> , <b>6a–d</b>   | 5–9   |
| Figures S11–S20. <sup>13</sup> C NMR spectra of the compounds <b>4a–b</b> , <b>5a–d</b> , <b>6a–d</b> | 10–14 |
| Figures S21–S30. FT–IR spectra of the compounds <b>4a–b</b> , <b>5a–d</b> , <b>6a–d</b>               | 15–19 |
| Figures S31–S40. HRMS spectra of the compounds <b>4a–b</b> , <b>5a–d</b> , <b>6a–d</b>                | 20–24 |
| Figures S41–S42. <sup>1</sup> H– <sup>1</sup> H NOESY spectra of the compounds <b>4a–b</b>            | 25    |

## Characterization of the compounds **4a–b**, **5a–d**, **6a–d**

### Thiacalix[4]arene (**1,3-alternate**) **4a**.

White powder, m.p. 111 °C, yield: 0.48 g (88%). <sup>1</sup>H NMR (DMSO-*d*<sub>6</sub>, δ, ppm, J/Hz): 1.18 (18H, s, C(CH<sub>3</sub>)<sub>3</sub>), 1.23 (18H, s, C(CH<sub>3</sub>)<sub>3</sub>), 1.54-1.57 (6H, m, CH<sub>2</sub>CH<sub>2</sub>CH<sub>2</sub>), 2.08 (6H, s, N(CH<sub>3</sub>)<sub>2</sub>), 2.10 (12H, s, N(CH<sub>3</sub>)<sub>2</sub>), 2.16-2.19 (6H, m, CH<sub>2</sub>N), 2.45 (2H, m, OCH<sub>2</sub>CH<sub>2</sub>), 3.04-3.12 (6H, m, NHCH<sub>2</sub>), 3.56-3.69 (4H, m, OCH<sub>2</sub>C(O)), 3.83 (2H, m, CH<sub>2</sub>NH<sub>2</sub>), 4.22 (2H, s, OCH<sub>2</sub>C(O)), 7.32 (2H, s, CH<sub>Ar</sub>), 7.43 (2H, s, CH<sub>Ar</sub>), 7.57 (2H, s, CH<sub>Ar</sub>), 7.64 (2H, m, CH<sub>Ar</sub>), 7.66 (2H, m, C(O)NH), 7.81 (1H, m, C(O)NH). <sup>13</sup>C NMR (DMSO-*d*<sub>6</sub>, δ, ppm): 27.26, 30.62, 30.90, 36.77, 45.20, 56.76, 74.61, 77.64, 128.03, 128.32, 129.53, 133.35, 133.98, 135.26, 135.71, 146.50, 146.79, 156.74, 159.13, 159.67, 167.44, 167.95. <sup>1</sup>H-<sup>1</sup>H NOESY: H<sup>1</sup>/H<sup>2</sup>, H<sup>1</sup>/H<sup>3</sup>, H<sup>1</sup>/H<sup>4</sup>, H<sup>1</sup>/H<sup>5</sup>, H<sup>1</sup>/H<sup>6</sup>, H<sup>1</sup>/H<sup>7</sup>. FTIR ATR (ν, cm<sup>-1</sup>): 1667 (C=O), 2952, 3322 (NH). HRMS: calculated: [M + H]<sup>+</sup> *m/z* = 1190.6249, [M + 2H]<sup>2+</sup> *m/z* = 595.8161, [M + 3H]<sup>3+</sup> *m/z* = 397.5465, [M + 4H]<sup>4+</sup> *m/z* = 297.4117; found: [M + H]<sup>+</sup> *m/z* = 1190.6248, [M + 2H]<sup>2+</sup> *m/z* = 595.8162, [M + 3H]<sup>3+</sup> *m/z* = 397.5472, [M + 4H]<sup>4+</sup> *m/z* = 297.4120.

### Thiacalix[4]arene (**cone**) **4b**.

White powder, m.p. 131-134 °C, yield: 0.42 g (80%). <sup>1</sup>H NMR (DMSO-*d*<sub>6</sub>, δ, ppm, J/Hz): 0.96 (18H, s, C(CH<sub>3</sub>)<sub>3</sub>), 1.18 (18H, s, C(CH<sub>3</sub>)<sub>3</sub>), 1.58-1.64 (6H, m, CH<sub>2</sub>CH<sub>2</sub>CH<sub>2</sub>), 2.08 (6H, s, N(CH<sub>3</sub>)<sub>2</sub>), 2.10 (12H, s, N(CH<sub>3</sub>)<sub>2</sub>), 2.15-2.22 (6H, m, CH<sub>2</sub>N), 3.04 (2H, m, OCH<sub>2</sub>CH<sub>2</sub>), 3.21-3.24 (6H, m, NHCH<sub>2</sub>), 4.13 (2H, m, CH<sub>2</sub>NH<sub>2</sub>), 4.53-4.63 (4H, m, OCH<sub>2</sub>C(O)), 4.83 (2H, s, OCH<sub>2</sub>C(O)), 7.20 (2H, s, CH<sub>Ar</sub>), 7.22 (2H, s, CH<sub>Ar</sub>), 7.62 (4H, s, CH<sub>Ar</sub>), 8.58 (1H, m, C(O)NH), 8.73 (2H, m, C(O)NH). <sup>13</sup>C NMR (DMSO-*d*<sub>6</sub>, δ, ppm.): 27.07, 30.71, 30.79, 36.95, 37.39, 45.13, 45.22, 56.88, 57.00, 70.30, 70.56, 72.56, 127.17, 127.32, 127.80, 128.53, 129.07, 130.99, 132.68, 132.97, 146.15, 156.90, 166.96. <sup>1</sup>H-<sup>1</sup>H NOESY: H<sup>1</sup>/H<sup>5</sup>, H<sup>3</sup>/H<sup>4</sup>, H<sup>2</sup>/H<sup>5</sup>, H<sup>6</sup>/H<sup>7</sup>, H<sup>7</sup>/H<sup>8</sup>. FTIR ATR (ν, cm<sup>-1</sup>): 1672 (C=O), 2952, 3312 (NH). HRMS: calculated: [M + H]<sup>+</sup> *m/z* = 1190.6249, [M + 2H]<sup>2+</sup> *m/z* = 595.8161, [M + 3H]<sup>3+</sup> *m/z* = 397.5465, [M + 4H]<sup>4+</sup> *m/z* = 297.4117; found: [M + H]<sup>+</sup> *m/z* = 1190.6240, [M + 2H]<sup>2+</sup> *m/z* = 595.8174, [M + 3H]<sup>3+</sup> *m/z* = 397.5492, [M + 4H]<sup>4+</sup> *m/z* = 298.4127.

### Thiacalix[4]arene (**1,3-alternate**) **5a**.

Orange powder, m.p. 182-184 °C, yield: 0.44 g (95%). <sup>1</sup>H NMR (DMSO-*d*<sub>6</sub>, δ, ppm, J/Hz): 1.19 (18H, s, C(CH<sub>3</sub>)<sub>3</sub>), 1.23 (18H, s, C(CH<sub>3</sub>)<sub>3</sub>), 1.61-1.70 (6H, m, CH<sub>2</sub>CH<sub>2</sub>N), 2.31 (18H, s, N(CH<sub>3</sub>)<sub>2</sub>), 3.11-3.17 (6H, m, NCH<sub>2</sub>CH<sub>2</sub>CH<sub>2</sub>N), 3.24-3.32 (6H, m, NCH<sub>2</sub>CH<sub>2</sub>CH<sub>2</sub>N), 3.65 (4H, br.s, CH<sub>2</sub>C(O)), 3.86 (2H, m, OCH<sub>2</sub>CH<sub>2</sub>), 4.03 (2H, m, OCH<sub>2</sub>CH<sub>2</sub>), 4.18 (2H, br.s, CH<sub>2</sub>C(O)), 6.58 (5H, m, CH<sub>Ar</sub>), 6.68 (3H, m, CH<sub>Ar</sub>), 7.21 (1H, m, CH<sub>Ar</sub>), 7.44 (2H, m, CH<sub>Ar</sub>), 7.48 (1H, m, CH<sub>Ar</sub>), 7.68 (2H, s, CH<sub>Ar</sub>), 7.76 (1H, m, C(O)NH), 7.87 (2H, m, C(O)NH), 8.12 (2H, m, CH<sub>Ar</sub>), 10.17 (2H, NHC(S)NH). <sup>13</sup>C NMR (DMSO-*d*<sub>6</sub>, δ, ppm.): 22.96, 24.45, 30.86, 33.99, 35.83, 42.34, 52.29, 54.54, 63.26, 71.17, 102.32, 112.52, 127.15, 127.53, 128.75, 130.59, 132.04, 134.20, 146.14, 151.94, 157.27, 159.51, 162.33, 167.55. FTIR ATR (ν, cm<sup>-1</sup>): 3297 (NH), 2960 (CH<sub>3</sub>), 1574 (NH), 1460 (CH<sub>3</sub>), 1330 (C=S), 1208 (C(CH<sub>3</sub>)<sub>3</sub>), 849 (CH<sub>Ar</sub>). HRMS: calculated: [M + H]<sup>+</sup> *m/z* = 1579.6607, [M + 2H]<sup>2+</sup> *m/z* = 790.8357, [M - Ph(OH)<sub>2</sub> + 3H]<sup>3+</sup> *m/z* = 492.2244; found: [M + H]<sup>+</sup> *m/z* = 1579.6205, [M + 2H]<sup>2+</sup> *m/z* = 790.8180, [M - Ph(OH)<sub>2</sub> + 3H]<sup>3+</sup> *m/z* = 492.1477.

### Thiacalix[4]arene (**cone**) **5b**.

Orange powder, m.p. 179-181 °C, yield: 0.43 g (93%). <sup>1</sup>H NMR (DMSO-*d*<sub>6</sub>, δ, ppm, J/Hz): 0.98 (18H, s, C(CH<sub>3</sub>)<sub>3</sub>), 1.14 (9H, s, C(CH<sub>3</sub>)<sub>3</sub>), 1.16 (9H, s, C(CH<sub>3</sub>)<sub>3</sub>), 1.71-1.82 (6H, m, CH<sub>2</sub>CH<sub>2</sub>N), 2.43 (18H, s, N(CH<sub>3</sub>)<sub>2</sub>), 2.63-2.68 (6H, m, NCH<sub>2</sub>CH<sub>2</sub>CH<sub>2</sub>N), 3.20-3.25 (6H, m, NCH<sub>2</sub>CH<sub>2</sub>CH<sub>2</sub>N), 4.05 (2H, m, OCH<sub>2</sub>CH<sub>2</sub>),

4.38 (2H, m, OCH<sub>2</sub>CH<sub>2</sub>), 4.73-4.85 (4H, m, CH<sub>2</sub>C(O)), 4.91 (2H, br.s., CH<sub>2</sub>C(O)), 6.58 (3H, m, CH<sub>Ar</sub>), 6.68 (2H, s, CH<sub>Ar</sub>), 7.21 (3H, m, CH<sub>Ar</sub>), 7.26 (2H, m, CH<sub>Ar</sub>), 7.52 (4H, m, CH<sub>Ar</sub>), 7.87 (1H, m, C(O)NH), 8.31 (2H, m, C(O)NH), 8.48 (2H, m, CH<sub>Ar</sub>), 8.74 (1H, m, NHC(S)NH), 10.52 (1H, m, NHC(S)NH). <sup>13</sup>C NMR (DMSO-*d*<sub>6</sub>, δ, ppm.): 26.80, 30.58, 30.82, 44.31, 44.61, 55.98, 56.26, 74.38, 102.21, 109.75, 112.56, 127.84, 128.04, 128.25, 128.95, 129.29, 133.39, 133.87, 134.64, 135.52, 146.37, 146.52, 146.70, 151.89, 157.29, 158.67, 159.47, 168.06, 168.49, 180.46. FTIR ATR (ν, cm<sup>-1</sup>): 3311 (NH), 2958 (CH<sub>3</sub>), 1573 (NH), 1460 (CH<sub>3</sub>), 1327 (C=S), 1206 (C(CH<sub>3</sub>)<sub>3</sub>), 848 (CH<sub>Ar</sub>). HRMS: calculated: [M – Ar(OH)<sub>2</sub> + 3H<sup>+</sup>]<sup>3+</sup> *m/z* = 492.2244; founded: [M – Ar(OH)<sub>2</sub> + 3H<sup>+</sup>]<sup>3+</sup> *m/z* = 492.1492.

#### Thiacalix[4]arene (1,3-alternate) 5c.

Yellow powder, m.p. 177 °C, yield: 0.37 g (93%). <sup>1</sup>H NMR (DMSO-*d*<sub>6</sub>, δ, ppm, J/Hz): 1.19 (36H, s, C(CH<sub>3</sub>)<sub>3</sub>), 1.56-1.61 (6H, m, CH<sub>2</sub>CH<sub>2</sub>N), 2.10-2.11 (18H, br.s, N(CH<sub>3</sub>)<sub>2</sub>), 2.17-2.21 (6H, m, NCH<sub>2</sub>CH<sub>2</sub>CH<sub>2</sub>N), 3.09-3.19 (6H, m, NCH<sub>2</sub>CH<sub>2</sub>CH<sub>2</sub>N), 3.30 (2H, m, OCH<sub>2</sub>CH<sub>2</sub>), 3.63 (2H, br.s., CH<sub>2</sub>C(O)), 3.74-3.85 (4H, q, *J* = 14.2 Hz, CH<sub>2</sub>C(O)), 4.01 (2H, m, OCH<sub>2</sub>CH<sub>2</sub>), 6.89 (1H, m, NHC(O)NH), 6.96 (1H, m, CH<sub>Ar</sub>), 7.22 (2H, m, CH<sub>Ar</sub>), 7.27 (2H, m, C(O)NH), 7.36 (1H, m, CH<sub>Ar</sub>), 7.38 (1H, m, CH<sub>Ar</sub>), 7.44 (1H, s, NHC(O)NH), 7.45 (2H, s, CH<sub>Ar</sub>), 7.46 (1H, m, C(O)NH), 7.51 (2H, s, CH<sub>Ar</sub>), 7.60-7.61 (4H, m, CH<sub>Ar</sub>). <sup>13</sup>C NMR (DMSO-*d*<sub>6</sub>, δ, ppm.): 26.88, 26.98, 30.68, 30.73, 33.88, 45.08, 56.78, 56.91, 70.51, 117.68, 118.13, 121.02, 121.74, 127.45, 127.75, 128.13, 128.53, 128.73, 130.68, 131.90, 132.40, 132.54, 139.69, 140.40, 146.04, 146.21, 152.50, 155.04, 156.30, 156.62, 157.07, 166.92, 167.28. FTIR ATR (ν, cm<sup>-1</sup>): 3315 (NH), 2950 (CH<sub>3</sub>), 1647 (NH(C=O)NH), 1542 (NH), 1440 (CH<sub>3</sub>), 1217 (C(CH<sub>3</sub>)<sub>3</sub>), 870 (CH<sub>Ar</sub>), 690 (CH<sub>Ar</sub>). HRMS: calculated: [M + 2H<sup>+</sup>]<sup>2+</sup> *m/z* = 655.3346, [M + 3H<sup>+</sup>]<sup>3+</sup> *m/z* = 437.2255; found: [M + 2H<sup>+</sup>]<sup>2+</sup> *m/z* = 655.2865, [M + 3H<sup>+</sup>]<sup>3+</sup> *m/z* = 437.1881.

#### Thiacalix[4]arene (cone) 5d.

Yellow powder, m.p. 180 °C, yield: 0.39 g (93%). <sup>1</sup>H NMR (DMSO-*d*<sub>6</sub>, δ, ppm, J/Hz): 1.02 (18H, s, C(CH<sub>3</sub>)<sub>3</sub>), 1.11 (18H, s, C(CH<sub>3</sub>)<sub>3</sub>), 1.55-1.63 (6H, m, CH<sub>2</sub>CH<sub>2</sub>N), 2.06 (12H, s, N(CH<sub>3</sub>)<sub>2</sub>), 2.08 (6H, s, N(CH<sub>3</sub>)<sub>2</sub>), 2.15-2.18 (6H, m, NCH<sub>2</sub>CH<sub>2</sub>CH<sub>2</sub>N), 3.16-3.24 (6H, m, NCH<sub>2</sub>CH<sub>2</sub>CH<sub>2</sub>N), 3.60 (2H, t, *J* = 5.3 Hz, OCH<sub>2</sub>CH<sub>2</sub>), 4.14 (2H, t, *J* = 6.0 Hz, OCH<sub>2</sub>CH<sub>2</sub>), 4.81 (6H, br.s., CH<sub>2</sub>C(O)), 6.88 (1H, m, NHC(O)NH), 6.96 (1H, m, CH<sub>Ar</sub>), 7.20 (2H, m, CH<sub>Ar</sub>), 7.25 (1H, m, NHC(O)NH), 7.28 (3H, m, CH<sub>Ar</sub>), 7.33 (2H, m, CH<sub>Ar</sub>), 7.43 (3H, m, C(O)NH), 7.47 (5H, m, CH<sub>Ar</sub>). <sup>13</sup>C NMR (DMSO-*d*<sub>6</sub>, δ, ppm.): 26.93, 27.02, 30.76, 30.81, 33.89, 33.97, 37.05, 37.18, 45.14, 56.82, 56.96, 70.54, 117.65, 118.10, 121.83, 127.54, 127.80, 127.85, 128.23, 128.65, 128.84, 130.75, 131.95, 132.46, 132.62, 146.32, 156.67, 166.96. FTIR ATR (ν, cm<sup>-1</sup>): 3321 (NH), 2950 (CH<sub>3</sub>), 1668 (NH(C=O)NH), 1539 (NH), 1439 (CH<sub>3</sub>), 1228 (C(CH<sub>3</sub>)<sub>3</sub>), 878 (CH<sub>Ar</sub>), 692 (CH<sub>Ar</sub>). HRMS: calculated: [M + 2H<sup>+</sup>]<sup>2+</sup> *m/z* = 655.3346, [M – PhNH<sup>+</sup> + 3H<sup>+</sup>]<sup>2+</sup> *m/z* = 610.3152, [M + 3H<sup>+</sup>]<sup>3+</sup> *m/z* = 437.2255; found: [M + 2H<sup>+</sup>]<sup>2+</sup> *m/z* = 655.2876, [M – PhNH<sup>+</sup> + 3H<sup>+</sup>]<sup>2+</sup> *m/z* = 610.1394, [M + 3H<sup>+</sup>]<sup>3+</sup> *m/z* = 437.1891.

#### Thiacalix[4]arene (1,3-alternate) 6a.

Pale orange powder, m.p. 175-177 °C, yield: 0.12 g (96%). <sup>1</sup>H NMR (DMSO-*d*<sub>6</sub>, δ, ppm, J/Hz): 1.19 (36H, s, C(CH<sub>3</sub>)<sub>3</sub>), 1.79-1.94 (6H, m, CH<sub>2</sub>CH<sub>2</sub>N<sup>+</sup>), 2.76 (3H, br.s, N<sup>+</sup>CH<sub>3</sub>), 2.79 (6H, br.s, N<sup>+</sup>CH<sub>3</sub>), 3.04 (6H, br.s, N<sup>+</sup>CH<sub>3</sub>), 3.09 (9H, br.s, N<sup>+</sup>CH<sub>3</sub>), 3.15-3.21 (6H, m, NCH<sub>2</sub>CH<sub>2</sub>CH<sub>2</sub>N<sup>+</sup>), 3.62-3.80 (10H, m, OCH<sub>2</sub>, OCH<sub>2</sub>CH<sub>2</sub>), 4.17-4.29 (6H, m, CH<sub>2</sub>N<sup>+</sup>), 6.48-6.59 (4H, m, CH<sub>Ar</sub>), 6.69 (2H, s, CH<sub>Ar</sub>), 7.13-7.29 (3H, m, C(O)NH), 7.42-7.46 (2H, m, CH<sub>Ar</sub>), 7.48-7.54 (2H, m, CH<sub>Ar</sub>), 7.70 (4H, br.s, CH<sub>Ar</sub>), 7.87-7.91 (3H, m, CH<sub>Ar</sub>), 8.21 (1H, m, NHC(S)NH), 9.23 (1H, m, NHC(S)NH), 10.16 (2H, br.s, ArOH). <sup>13</sup>C NMR (DMSO-*d*<sub>6</sub>, δ, ppm.): 22.96, 24.45, 30.86, 33.99, 35.83, 52.29, 63.26, 63.36, 71.22, 102.32, 109.73, 112.52, 127.12, 127.51,

128.78, 130.59, 132.07, 133.98, 146.14, 151.94, 157.32, 159.51, 162.33, 167.55. FTIR ATR ( $\nu$ ,  $\text{cm}^{-1}$ ): 3183 (NH), 2953 ( $\text{CH}_3$ ), 1658 ( $\text{N}^+(\text{CH}_3)_3$ ), 1535 (NH), 1437 ( $\text{CH}_3$ ), 1337 ( $\text{C}=\text{S}$ ), 1217 ( $\text{C}(\text{CH}_3)_3$ ), 849 ( $\text{CH}_{\text{Ar}}$ ). HRMS: calculated:  $[\text{M} - 3\text{I}^- - \text{H}^+]^{2+} m/z = 811.3575$ ; found:  $[\text{M} - 3\text{I}^- - \text{H}^+]^{2+} m/z = 811.3397$ .

**Thiacalix[4]arene (cone) 6b.**

Pale orange powder, m.p. 190-192 °C, yield: 0.11 g (93%).  $^1\text{H}$  NMR ( $\text{DMSO}-d_6$ ,  $\delta$ , ppm,  $J/\text{Hz}$ ): 1.04 (18H, br.s,  $\text{C}(\text{CH}_3)_3$ ), 1.10 (18H, s,  $\text{C}(\text{CH}_3)_3$ ), 1.85-1.95 (6H, m,  $\text{CH}_2\text{CH}_2\text{N}$ ), 3.03 (27H, s,  $\text{N}^+(\text{CH}_3)_2$ ), 3.05-3.08 (6H, m,  $\text{NCH}_2\text{CH}_2\text{CH}_2\text{N}^+$ ), 3.25-3.29 (6H, m,  $\text{NCH}_2\text{CH}_2\text{CH}_2\text{N}^+$ ), 4.40 (2H, br.s,  $\text{CH}_2\text{C}(\text{O})$ ), 4.55 (2H, m,  $\text{OCH}_2\text{CH}_2$ ), 4.75 (2H, m,  $\text{OCH}_2\text{CH}_2$ ), 4.88 (4H, m,  $\text{CH}_2\text{C}(\text{O})$ ), 6.54-6.60 (5H, m,  $\text{CH}_{\text{Ar}}$ ), 6.68-6.69 (3H, m,  $\text{CH}_{\text{Ar}}$ ), 7.08 (1H, m,  $\text{NHC}(\text{S})\text{NH}$ ), 7.13-7.19 (2H, m,  $\text{CH}_{\text{Ar}}$ ), 7.27-7.29 (1H, m,  $\text{CH}_{\text{Ar}}$ ), 7.36-7.38 (2H, m,  $\text{CH}_{\text{Ar}}$ ), 7.44-7.46 (2H, m,  $\text{CH}_{\text{Ar}}$ ), 7.52-7.56 (1H, m,  $\text{CH}_{\text{Ar}}$ ), 7.83-7.95 (1H, m,  $\text{CH}_{\text{Ar}}$ ), 8.50 (2H, m,  $\text{C}(\text{O})\text{NH}$ ), 8.71 (1H, m,  $\text{NHC}(\text{S})\text{NH}$ ), 9.21 (1H, m,  $\text{C}(\text{O})\text{NH}$ ), 10.16 (2H, br.s,  $\text{ArOH}$ ).  $^{13}\text{C}$  NMR ( $\text{DMSO}-d_6$ ,  $\delta$ , ppm.): 22.94, 30.44, 30.66, 31.04, 35.55, 42.33, 42.38, 52.32, 54.62, 63.33, 102.31, 112.60, 127.88, 128.31, 128.90, 146.75, 151.92, 159.56, 167.92, 168.52. FTIR ATR ( $\nu$ ,  $\text{cm}^{-1}$ ): 3198 (NH), 2955 ( $\text{CH}_3$ ), 1662 ( $\text{N}^+(\text{CH}_3)_3$ ), 1542 (NH), 1439 ( $\text{CH}_3$ ), 1337 ( $\text{C}=\text{S}$ ), 1218 ( $\text{C}(\text{CH}_3)_3$ ), 848 ( $\text{CH}_{\text{Ar}}$ ). HRMS: calculated:  $[\text{M} - 3\text{I}^- - \text{N}(\text{CH}_3)_3]^{3+} m/z = 521.2121$ , found:  $[\text{M} - 3\text{I}^- - \text{N}(\text{CH}_3)_3]^{3+} m/z = 521.1808$ .

**Thiacalix[4]arene (1,3-alternate) 6c.**

Yellow powder, m.p. 154 °C, yield: 0.10 g (90%).  $^1\text{H}$  NMR ( $\text{DMSO}-d_6$ ,  $\delta$ , ppm,  $J/\text{Hz}$ ): 1.19 (9H, s,  $\text{C}(\text{CH}_3)_3$ ), 1.20 (9H, s,  $\text{C}(\text{CH}_3)_3$ ), 1.22 (18H, s,  $\text{C}(\text{CH}_3)_3$ ), 1.86-1.91 (6H, m,  $\text{CH}_2\text{CH}_2\text{N}$ ), 2.16 (2H, m,  $\text{OCH}_2\text{CH}_2$ ), 3.06 (27H, br.s,  $\text{N}^+(\text{CH}_3)_2$ ), 3.15-3.18 (6H, m,  $\text{NCH}_2\text{CH}_2\text{CH}_2\text{N}$ ), 3.19-3.23 (6H, m,  $\text{NCH}_2\text{CH}_2\text{CH}_2\text{N}^+$ ), 3.81-3.94 (6H, m,  $\text{CH}_2\text{C}(\text{O})$ ), 4.02 (2H, m,  $\text{OCH}_2\text{CH}_2$ ), 6.91 (1H, m,  $\text{NHC}(\text{O})\text{NH}$ ), 6.96 (1H, m,  $\text{CH}_{\text{Ar}}$ ), 7.21 (2H, m,  $\text{CH}_{\text{Ar}}$ ), 7.25 (2H, m,  $\text{CH}_{\text{Ar}}$ ), 7.37 (1H, m,  $\text{CH}_{\text{Ar}}$ ), 7.39 (1H, m,  $\text{CH}_{\text{Ar}}$ ), 7.43 (1H, s,  $\text{NHC}(\text{O})\text{NH}$ ), 7.45 (1H, s,  $\text{CH}_{\text{Ar}}$ ), 7.49 (1H, s,  $\text{CH}_{\text{Ar}}$ ), 7.58 (2H, m,  $\text{CH}_{\text{Ar}}$ ), 7.65 (2H, m,  $\text{CH}_{\text{Ar}}$ ), 7.97 (2H, m,  $\text{C}(\text{O})\text{NH}$ ), 8.20 (1H, m,  $\text{S}(\text{O})\text{NH}$ ).  $^{13}\text{C}$  NMR ( $\text{DMSO}-d_6$ ,  $\delta$ , ppm.): 22.88, 22.91, 30.81, 33.91, 33.95, 35.76, 35.92, 52.28, 63.29, 69.76, 70.98, 117.76, 118.13, 121.13, 121.78, 127.38, 127.70, 127.89, 128.30, 128.76, 131.07, 132.44, 133.18, 133.43, 139.67, 140.37, 145.96, 146.10, 152.50, 155.12, 157.07, 167.38, 167.49. FTIR ATR ( $\nu$ ,  $\text{cm}^{-1}$ ): 3278 (NH), 2954 ( $\text{CH}_3$ ), 1663 ( $\text{N}^+(\text{CH}_3)_3$ ), 1539 (NH), 1439 ( $\text{CH}_3$ ), 1227 ( $\text{C}(\text{CH}_3)_3$ ), 832 ( $\text{CH}_{\text{Ar}}$ ), 692 ( $\text{CH}_{\text{Ar}}$ ). HRMS: calculated:  $[\text{M} - 3\text{I}^-]^{3+} m/z = 451.2412$ ; found:  $[\text{M} - 3\text{I}^-]^{3+} m/z = 451.2049$ .

**Thiacalix[4]arene (cone) 6d.**

Yellow powder, m.p. 156 °C, yield: 0.11 g (91%).  $^1\text{H}$  NMR ( $\text{DMSO}-d_6$ ,  $\delta$ , ppm,  $J/\text{Hz}$ ): 1.03 (18H, s,  $\text{C}(\text{CH}_3)_3$ ), 1.11 (18H, s,  $\text{C}(\text{CH}_3)_3$ ), 1.89-1.96 (6H, m,  $\text{CH}_2\text{CH}_2\text{N}$ ), 3.04 (27H, s,  $\text{N}^+(\text{CH}_3)_2$ ), 3.27 (6H, m,  $\text{NCH}_2\text{CH}_2\text{CH}_2\text{N}$ ), 3.31 (6H, m,  $\text{NCH}_2\text{CH}_2\text{CH}_2\text{N}^+$ ), 3.56 (2H, m,  $\text{OCH}_2\text{CH}_2$ ), 4.17 (2H, m,  $\text{OCH}_2\text{CH}_2$ ), 4.78-4.83 (4H, m,  $\text{CH}_2\text{C}(\text{O})$ ), 4.87 (2H, s,  $\text{CH}_2\text{C}(\text{O})$ ), 6.92 (1H, m,  $\text{NHC}(\text{O})\text{NH}$ ), 6.98 (1H, m,  $\text{CH}_{\text{Ar}}$ ), 7.25-7.29 (3H, m,  $\text{CH}_{\text{Ar}}$ ), 7.33 (1H, m,  $\text{NHC}(\text{O})\text{NH}$ ), 7.36 (1H, m,  $\text{CH}_{\text{Ar}}$ ), 7.39-7.32 (3H, m,  $\text{CH}_{\text{Ar}}$ ), 7.44-7.48 (5H, m,  $\text{CH}_{\text{Ar}}$ ), 8.55 (1H, m,  $\text{C}(\text{O})\text{NH}$ ), 8.70 (2H, m,  $\text{C}(\text{O})\text{NH}$ ).  $^{13}\text{C}$  NMR ( $\text{DMSO}-d_6$ ,  $\delta$ , ppm.): 22.89, 23.06, 30.70, 30.82, 33.91, 34.04, 35.41, 35.55, 52.27, 63.32, 74.33, 74.41, 118.05, 118.13, 121.79, 128.25, 128.79, 134.26, 134.64, 134.78, 139.72, 140.36, 146.62, 152.53, 155.52, 157.88, 168.33, 168.51. FTIR ATR ( $\nu$ ,  $\text{cm}^{-1}$ ): 3273 (NH), 2955 ( $\text{CH}_3$ ), 1663 ( $\text{N}^+(\text{CH}_3)_3$ ), 1539 (NH), 1439 ( $\text{CH}_3$ ), 1230 ( $\text{C}(\text{CH}_3)_3$ ), 825 ( $\text{CH}_{\text{Ar}}$ ), 694 ( $\text{CH}_{\text{Ar}}$ ). HRMS: calculated:  $[\text{M} - 3\text{I}^-]^{3+} m/z = 451.2412$ ; found:  $[\text{M} - 3\text{I}^-]^{3+} m/z = 451.2034$ .



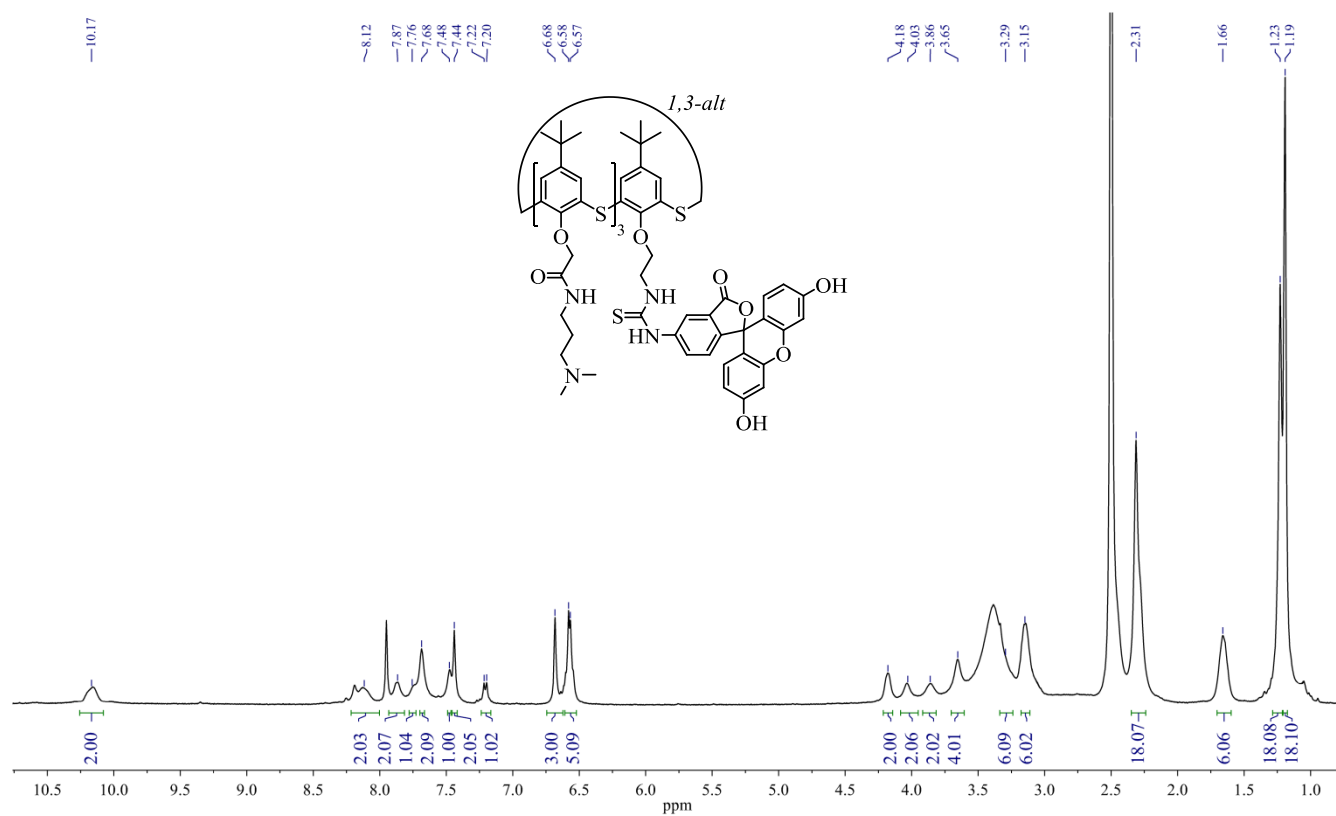

Figures S3. <sup>1</sup>H NMR spectrum of the compound **5a**, DMSO-*d*<sub>6</sub>, 298 K, 400 MHz.

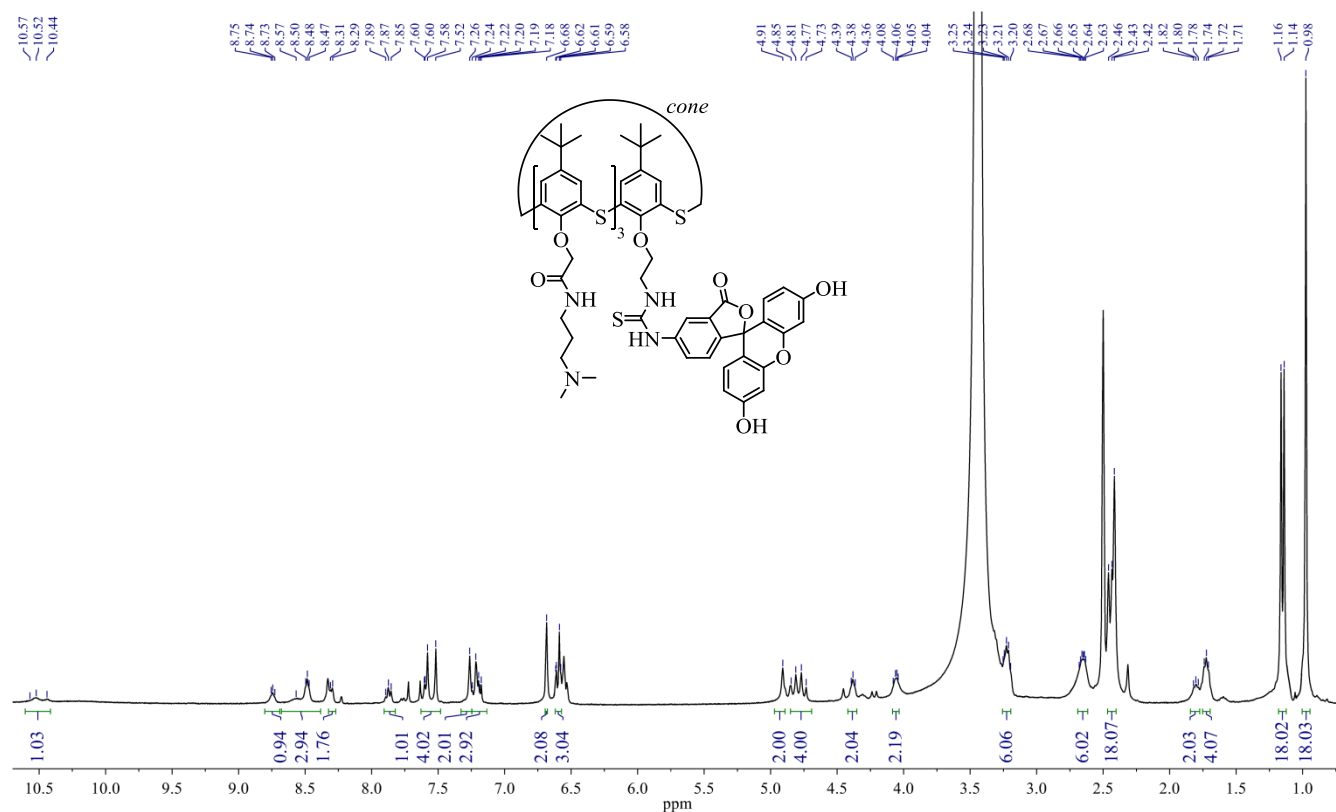

Figures S4. <sup>1</sup>H NMR spectrum of the compound **5b**, DMSO-*d*<sub>6</sub>, 298 K, 400 MHz.

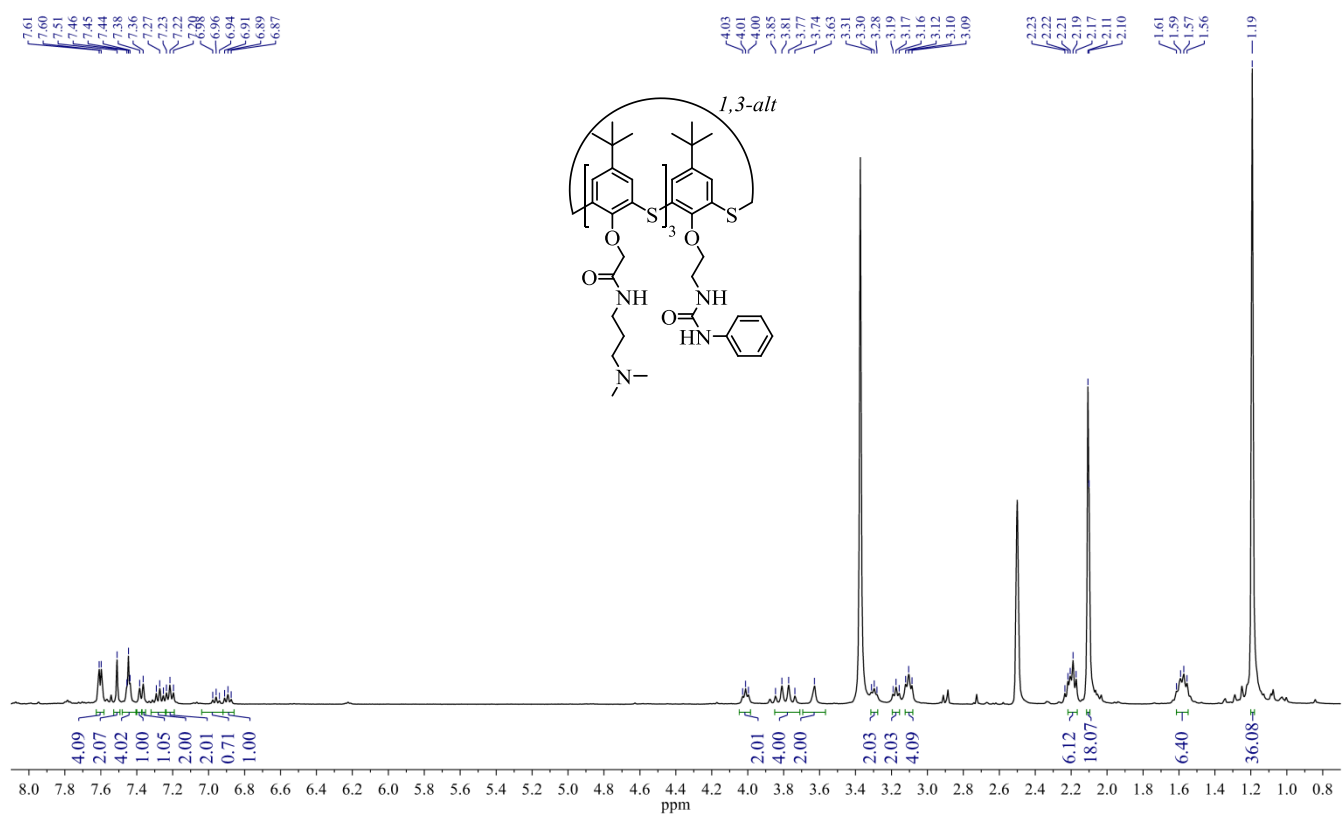

Figures S5. <sup>1</sup>H NMR spectrum of the compound **5c**, DMSO-*d*<sub>6</sub>, 298 K, 400 MHz.

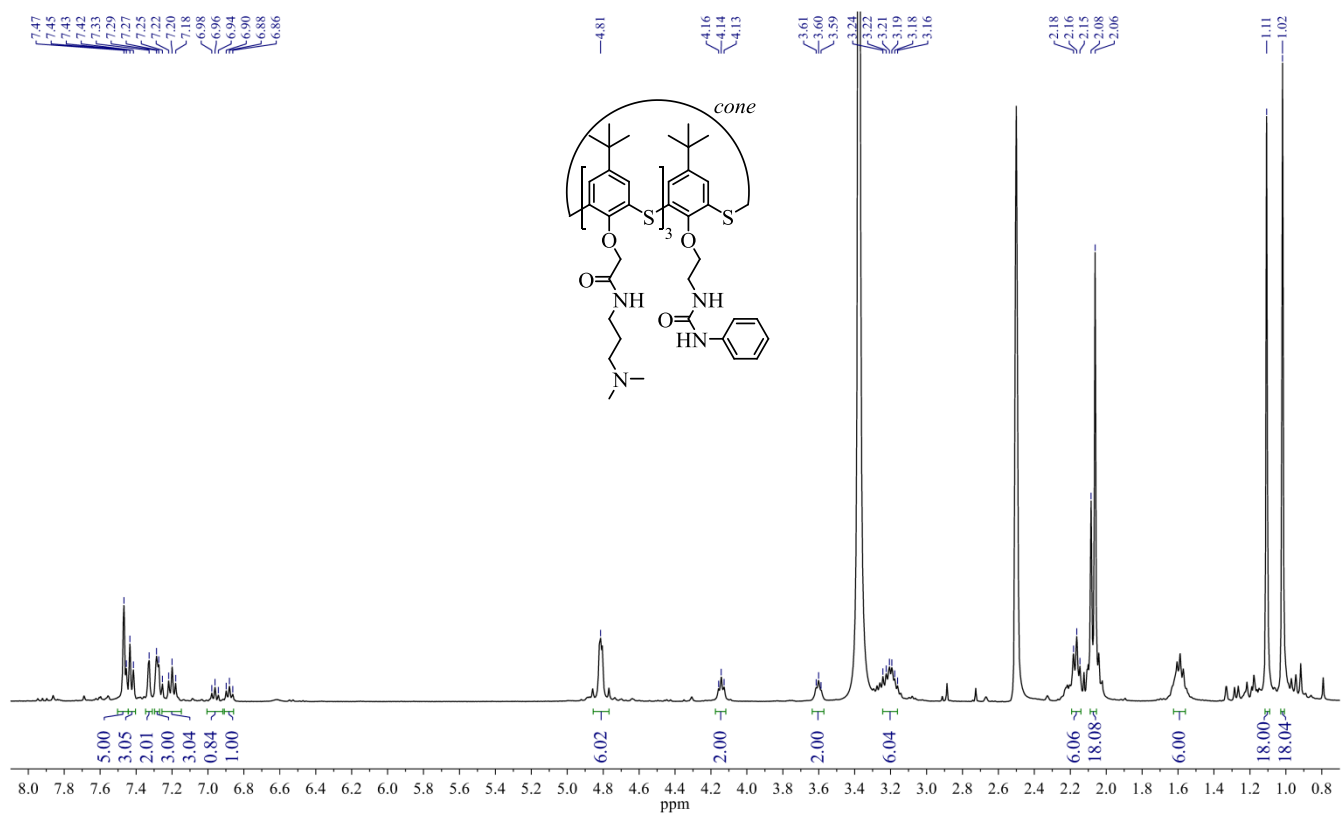

Figures S6. <sup>1</sup>H NMR spectrum of the compound **5d**, DMSO-*d*<sub>6</sub>, 298 K, 400 MHz.

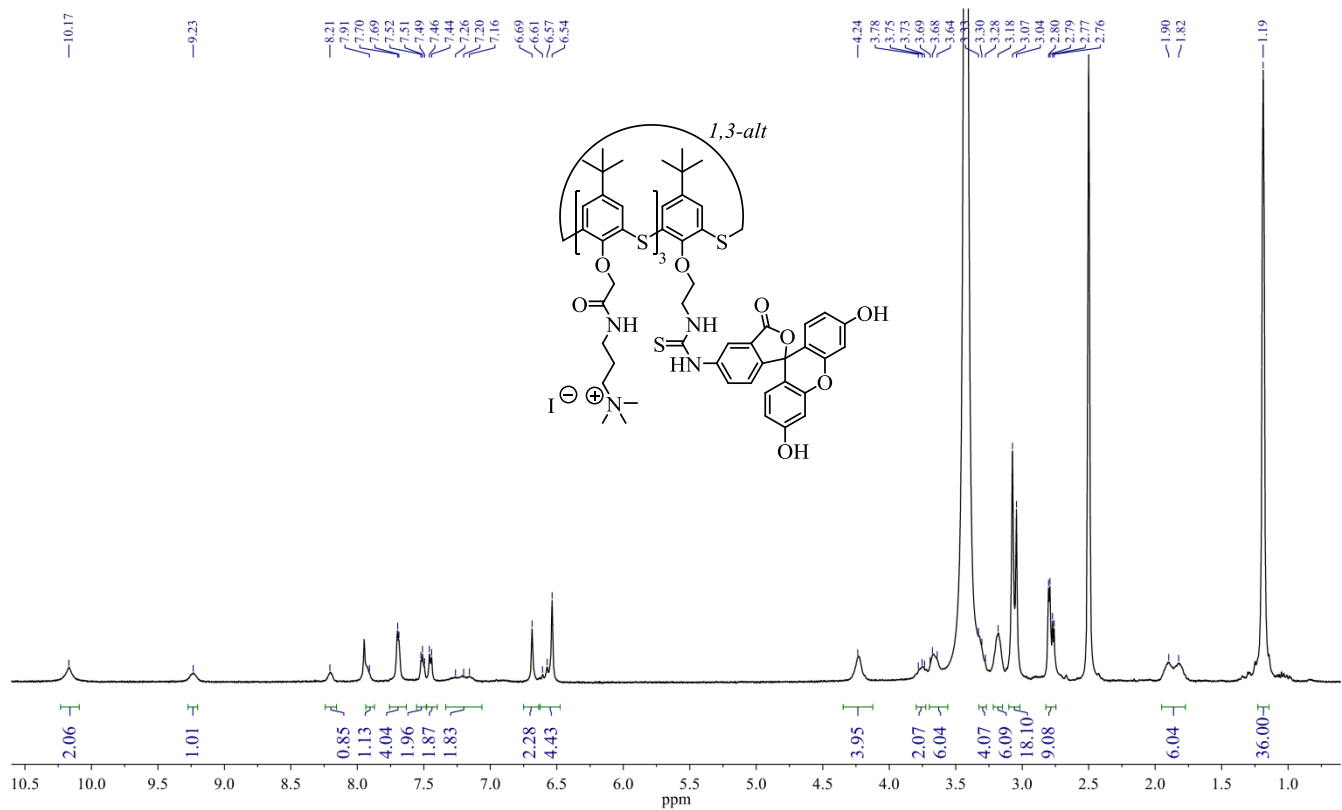

Figures S7.  $^1\text{H}$  NMR spectrum of the compound **6a**,  $\text{DMSO-}d_6$ , 298 K, 400 MHz.

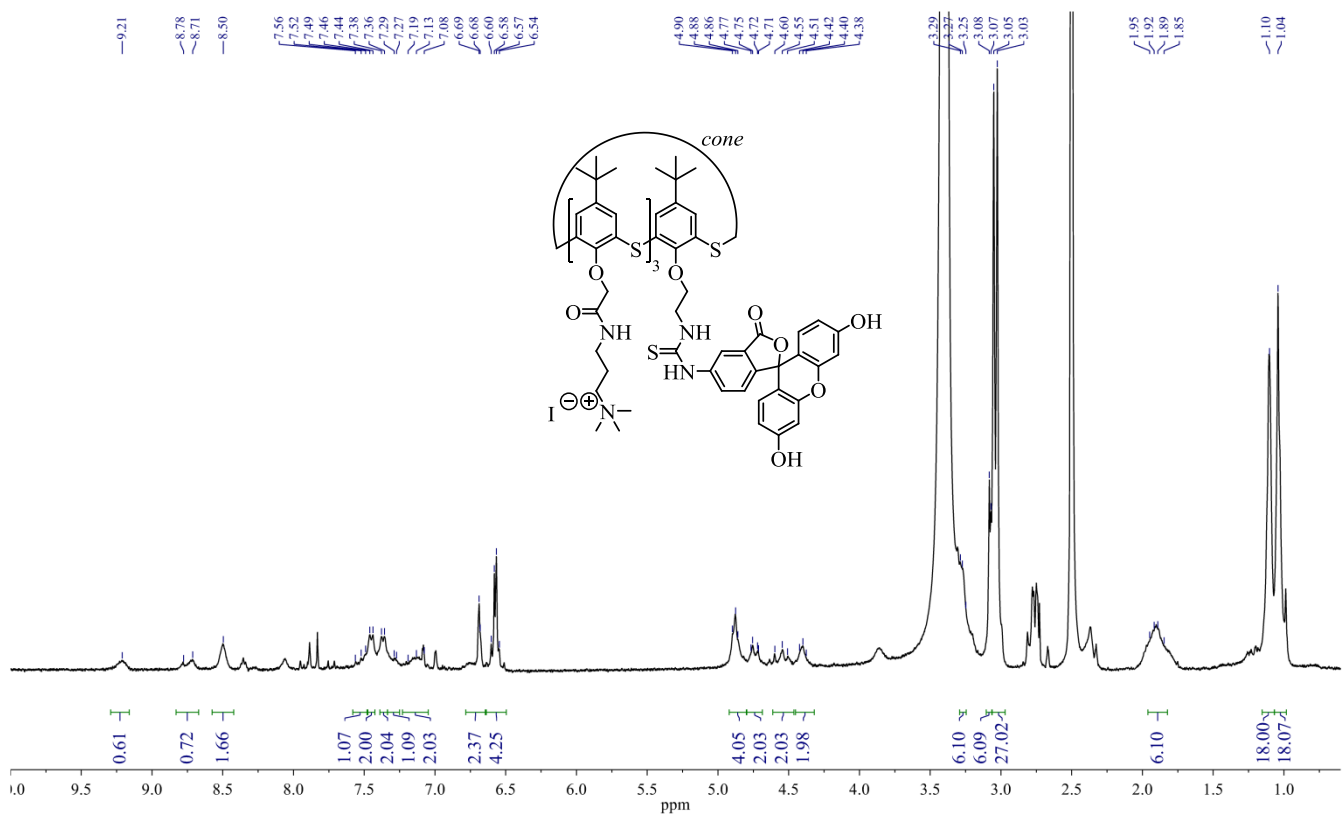

Figures S8.  $^1\text{H}$  NMR spectrum of the compound **6b**,  $\text{DMSO-}d_6$ , 298 K, 400 MHz.



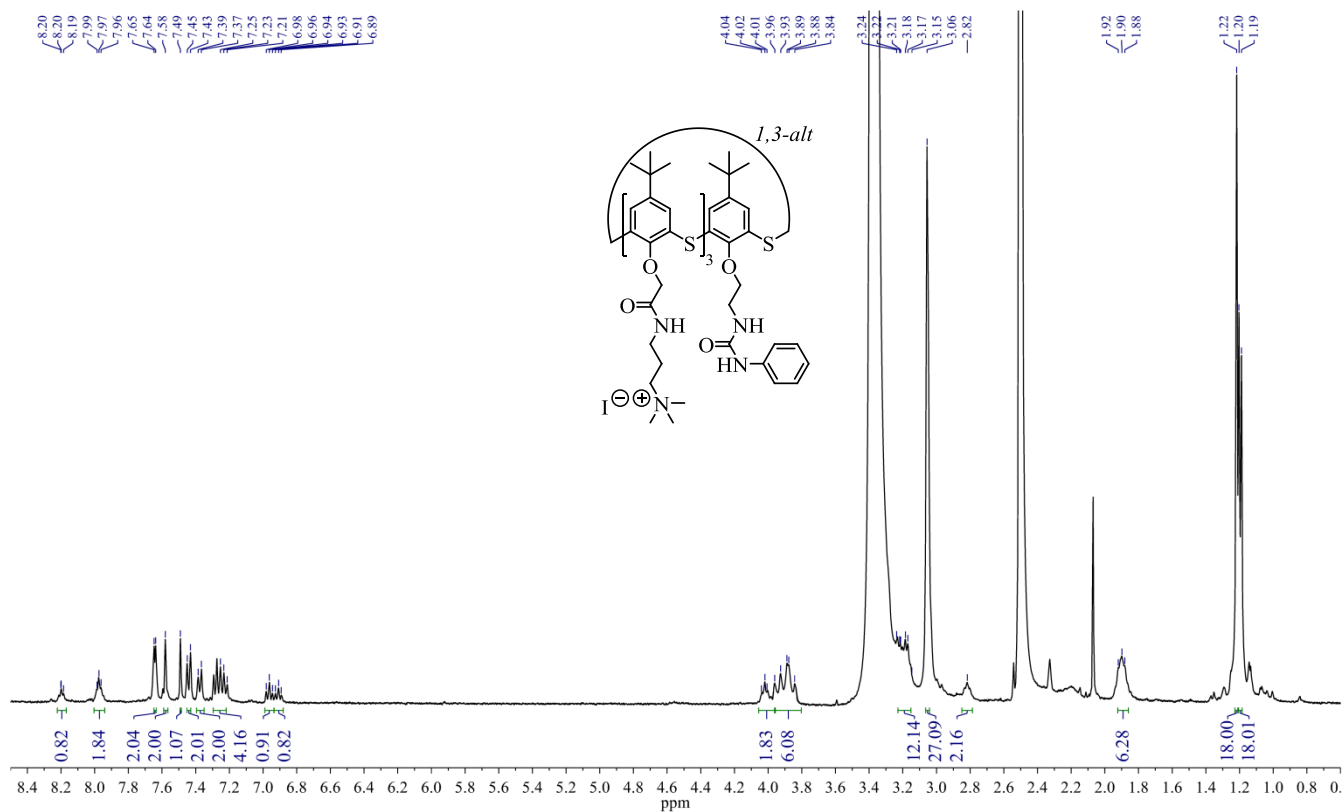

Figures S9. <sup>1</sup>H NMR spectrum of the compound **6c**, DMSO-*d*<sub>6</sub>, 298 K, 400 MHz.

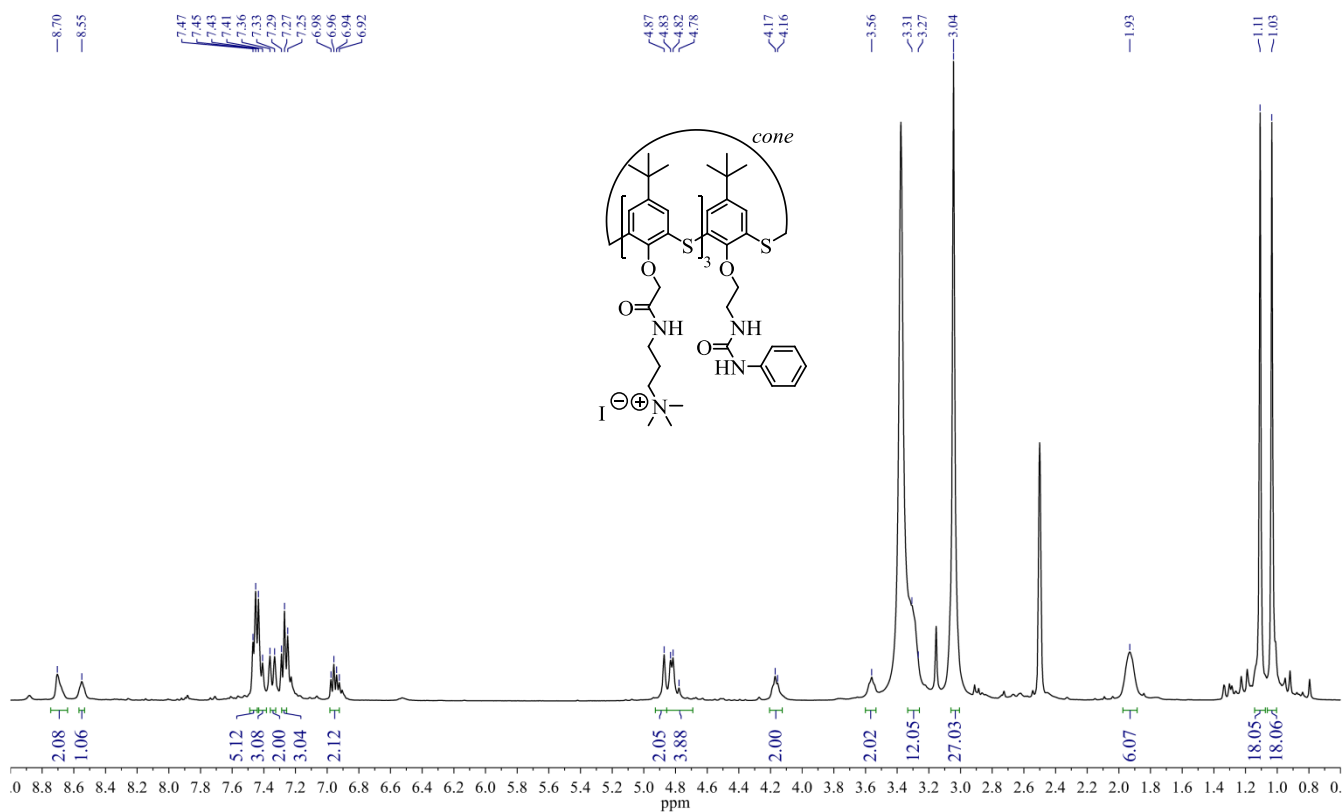

Figures S10. <sup>1</sup>H NMR spectrum of the compound **6d**, DMSO-*d*<sub>6</sub>, 298 K, 400 MHz.

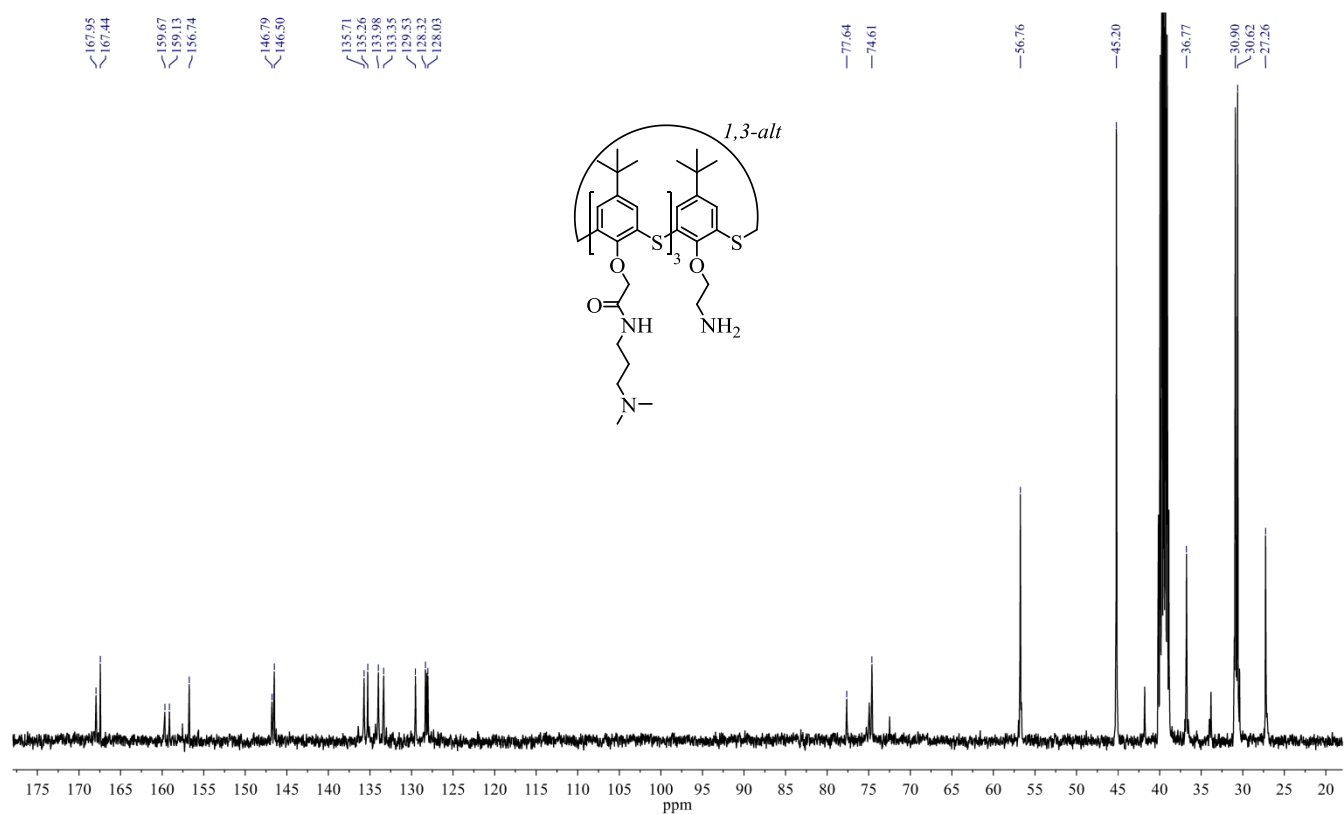

Figures S11. <sup>13</sup>C NMR spectrum of the compound **4a**, DMSO-*d*<sub>6</sub>, 298 K, 100 MHz.

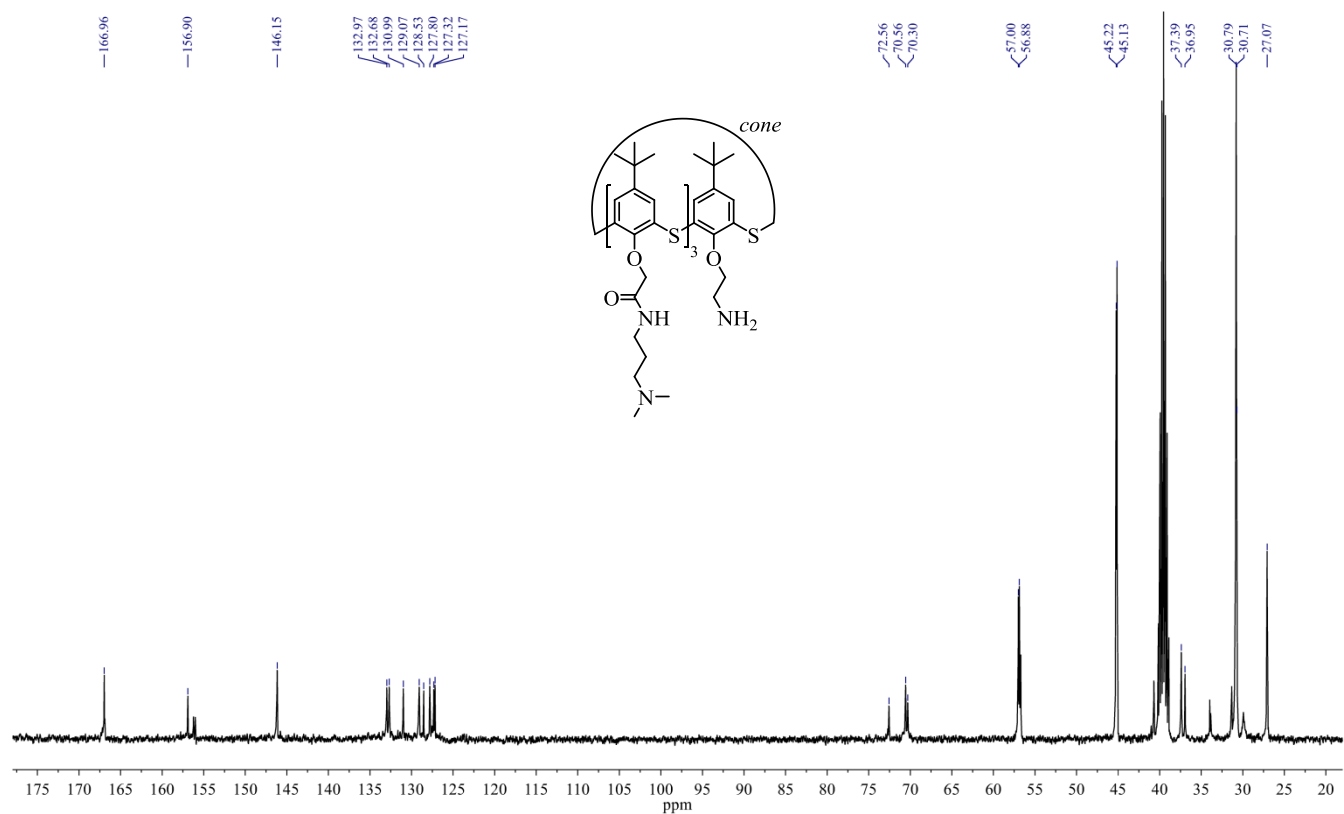

Figures S12. <sup>13</sup>C NMR spectrum of the compound **4b**, DMSO-*d*<sub>6</sub>, 298 K, 100 MHz.

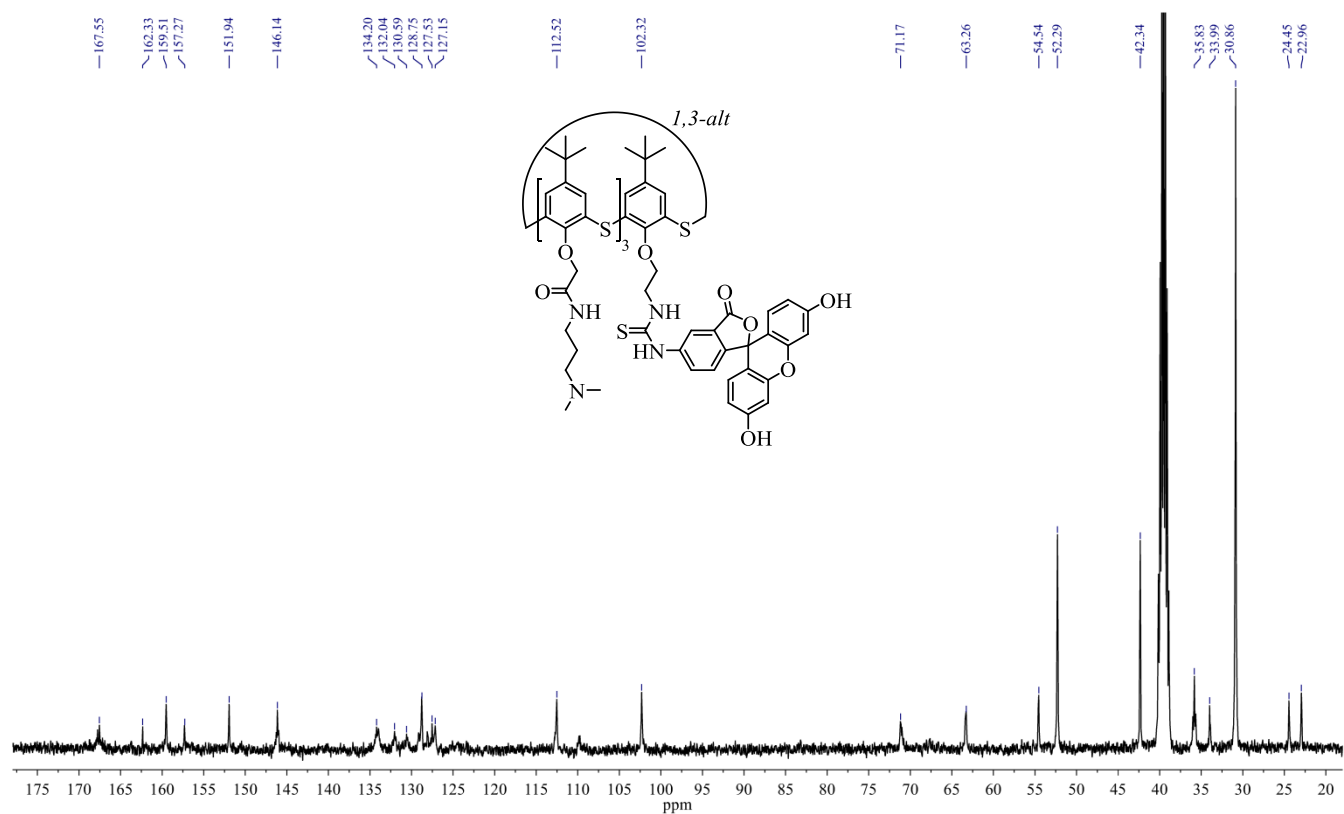

Figures S13. <sup>13</sup>C NMR spectrum of the compound **5a**, DMSO-*d*<sub>6</sub>, 298 K, 100 MHz.

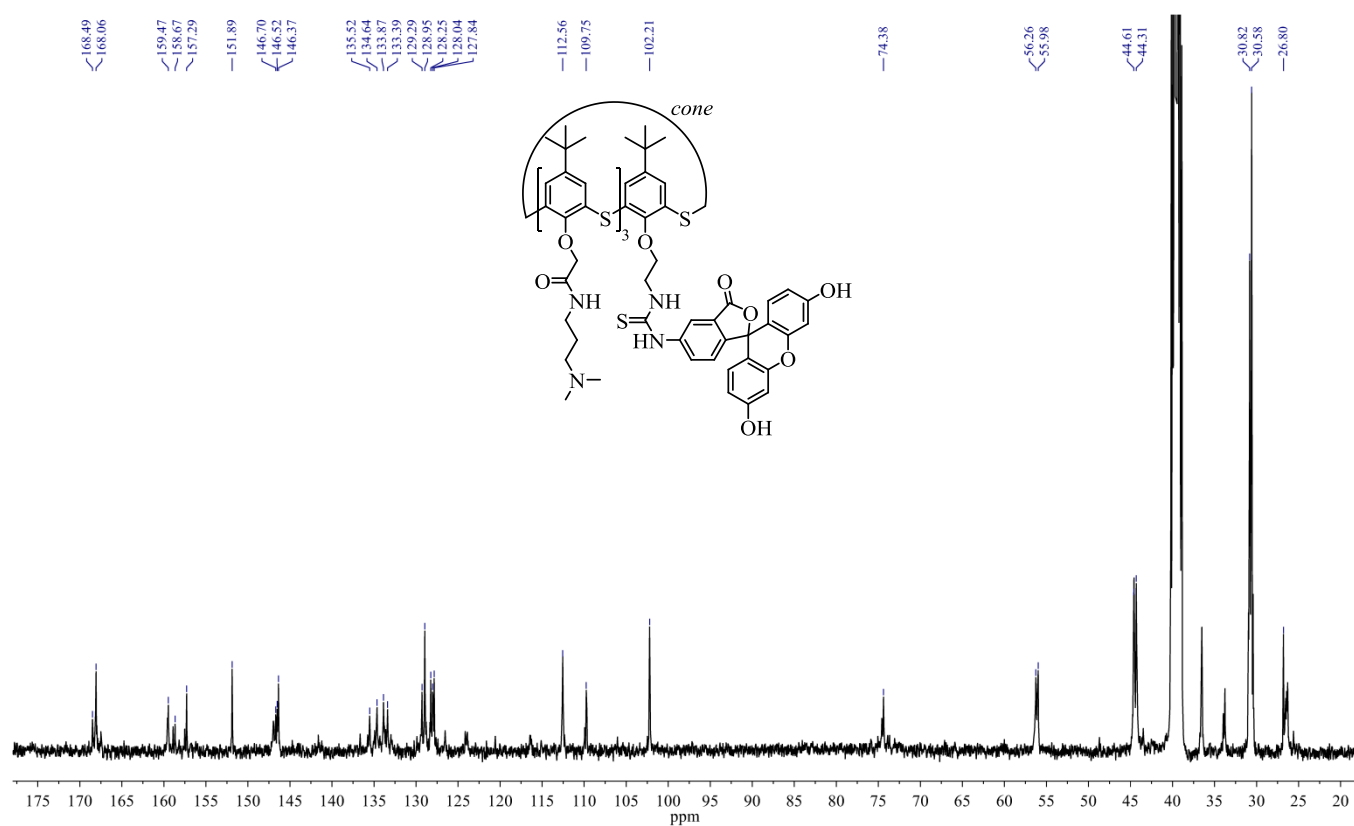

Figures S14. <sup>13</sup>C NMR spectrum of the compound **5b**, DMSO-*d*<sub>6</sub>, 298 K, 100 MHz.

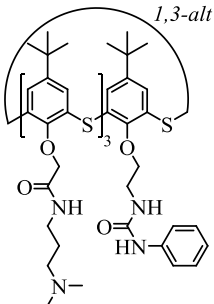

The figure displays the  $^{13}\text{C}$  NMR spectrum of a polymer, with the chemical structure of the repeating unit shown above the spectrum. The spectrum shows peaks from 26.93 to 166.96 ppm. The chemical structure is a block copolymer consisting of a poly(4-vinylpyridine) (P4VP) block and a poly(4-vinylbenzyltrimethylammonium) (P4VBTA) block, linked by a sulfonate group. The P4VP block is labeled "cone".

**Chemical Structure:** The structure shows a P4VP block (labeled "cone") and a P4VBTA block, linked by a sulfonate group. The P4VP block is a poly(4-vinylpyridine) chain, and the P4VBTA block is a poly(4-vinylbenzyltrimethylammonium) chain. The sulfonate group is represented by a  $\text{SO}_3^-$  group.

**$^{13}\text{C}$  NMR Spectrum:** The spectrum shows peaks corresponding to the chemical structure. The peaks are labeled with their chemical shifts in ppm:

- 166.96
- 156.67
- 146.32
- 132.62
- 132.46
- 131.95
- 130.75
- 128.84
- 128.65
- 128.23
- 127.85
- 127.80
- 127.54
- 121.83
- 118.10
- 117.65
- 70.54
- 56.96
- 56.82
- 45.14
- 37.18
- 37.05
- 33.97
- 33.89
- 30.81
- 30.76
- 27.02
- 26.93

Figures S16.  $^{13}\text{C}$  NMR spectrum of the compound **5d**, DMSO- $d_6$ , 298 K, 100 MHz.

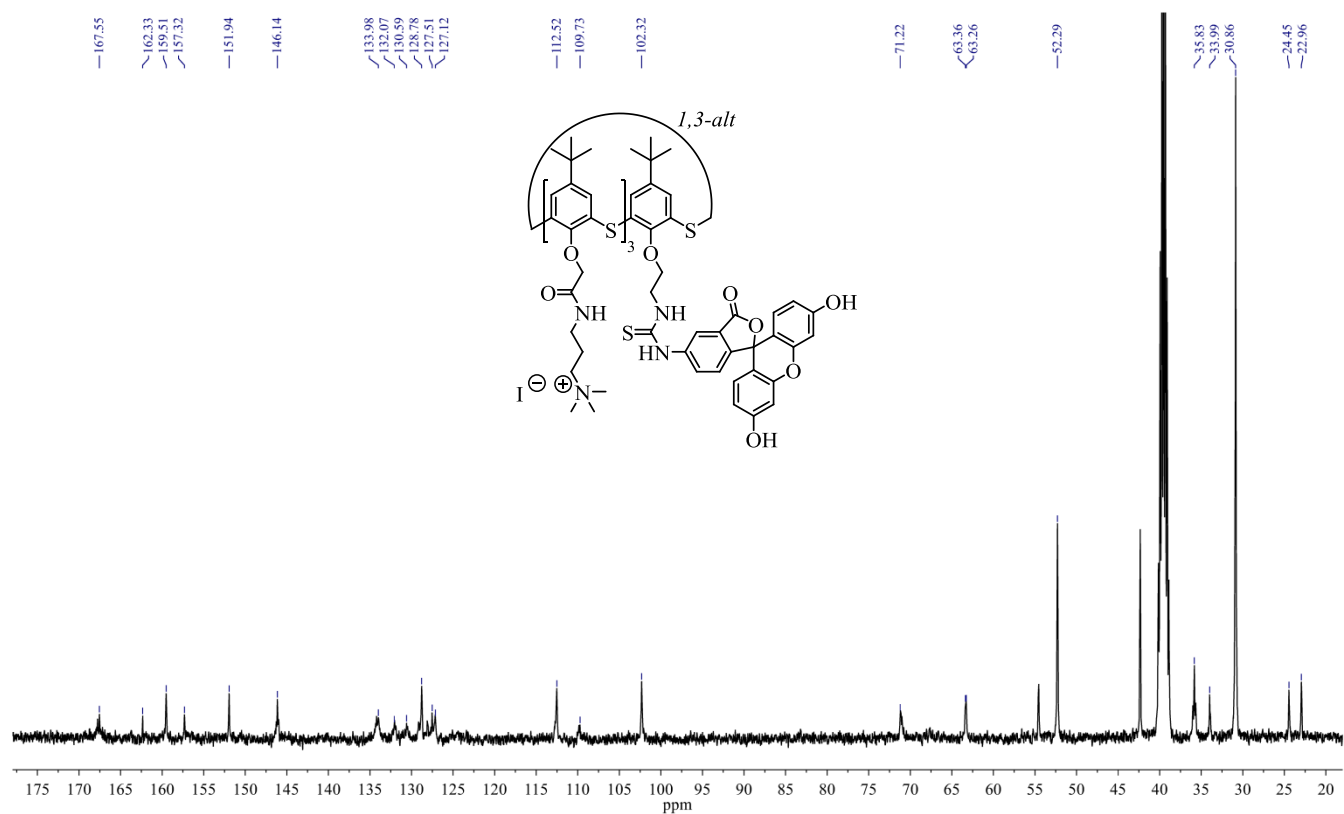

Figures S17. <sup>13</sup>C NMR spectrum of the compound **6a**, DMSO-*d*<sub>6</sub>, 298 K, 100 MHz.

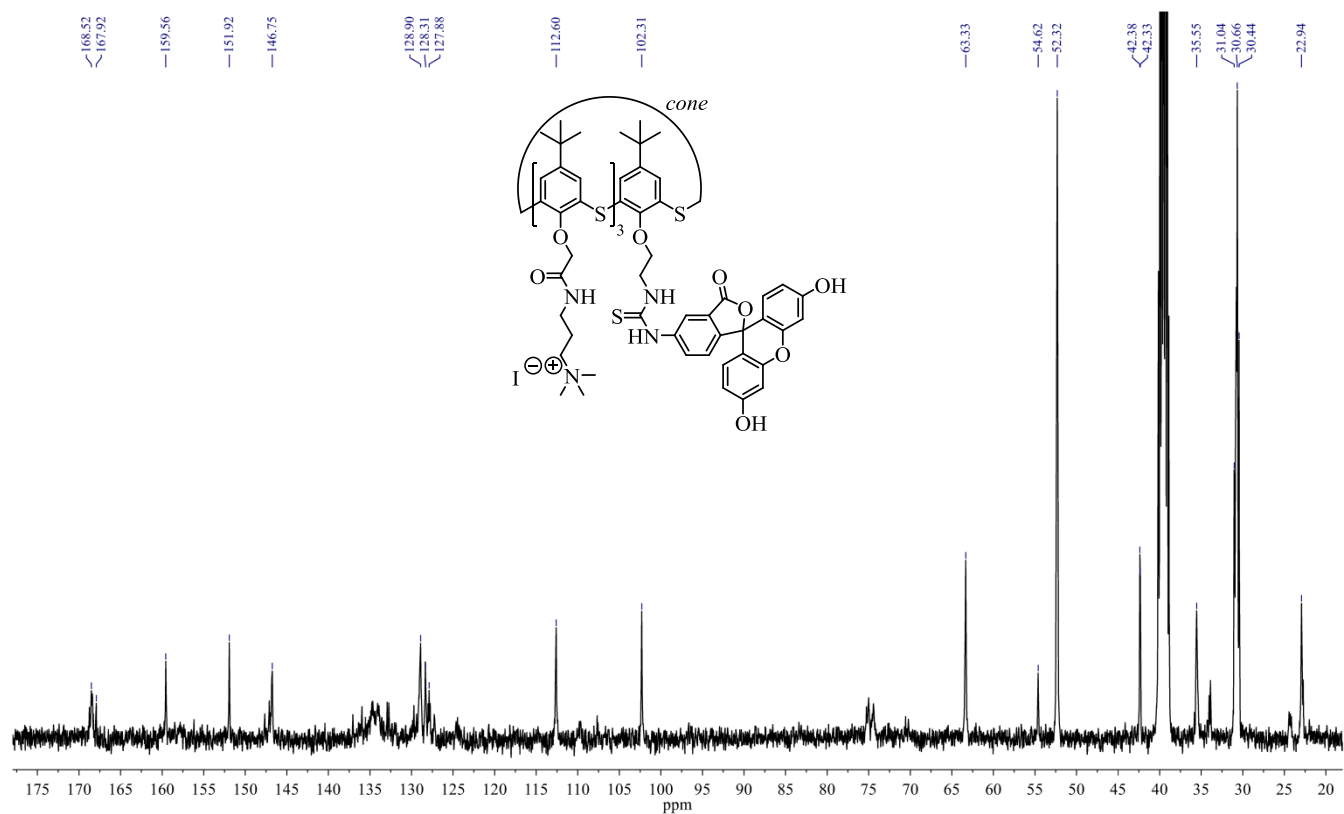

Figures S18. <sup>13</sup>C NMR spectrum of the compound **6b**, DMSO-*d*<sub>6</sub>, 298 K, 100 MHz.

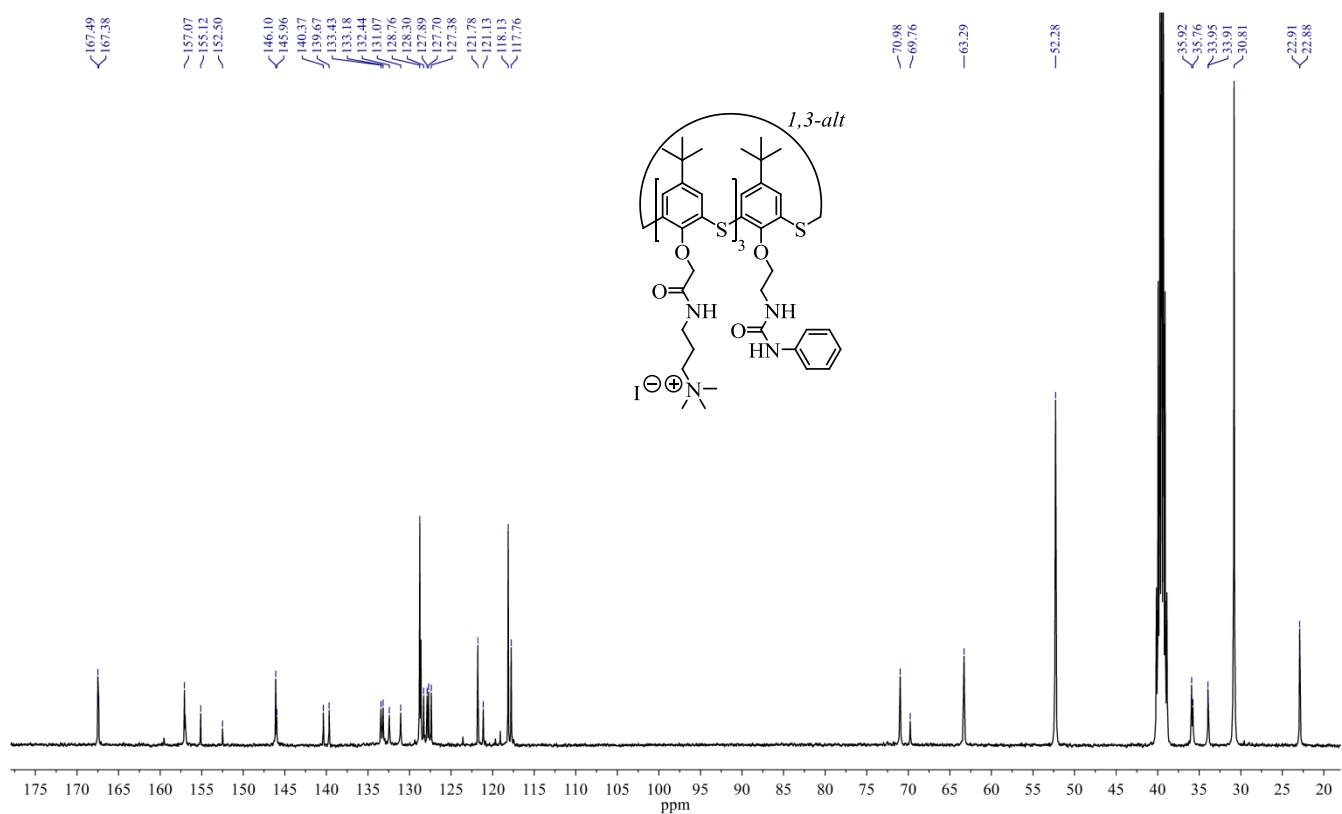

Figures S19.  $^{13}C$  NMR spectrum of the compound **6c**, DMSO- $d_6$ , 298 K, 100 MHz.

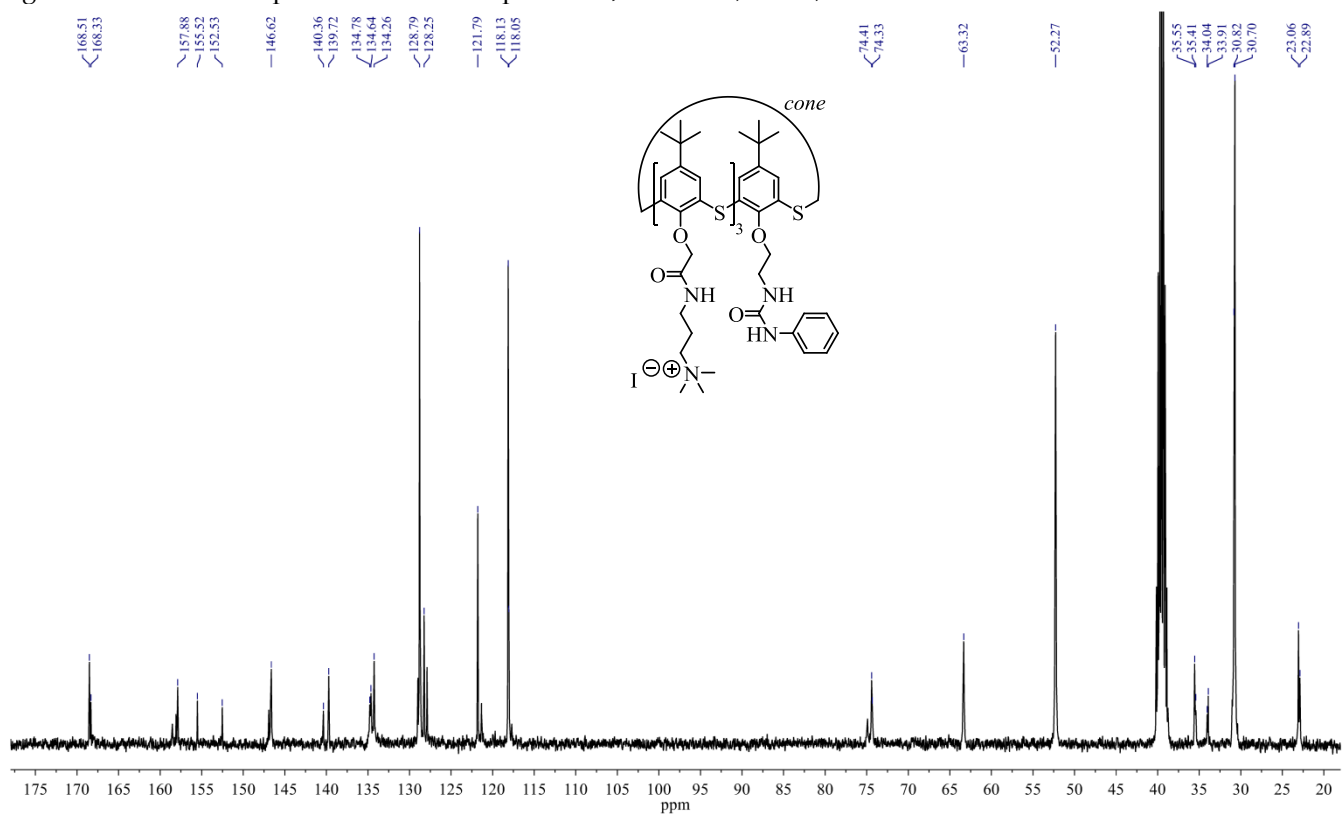

Figures S20.  $^{13}C$  NMR spectrum of the compound **6d**, DMSO- $d_6$ , 298 K, 100 MHz.

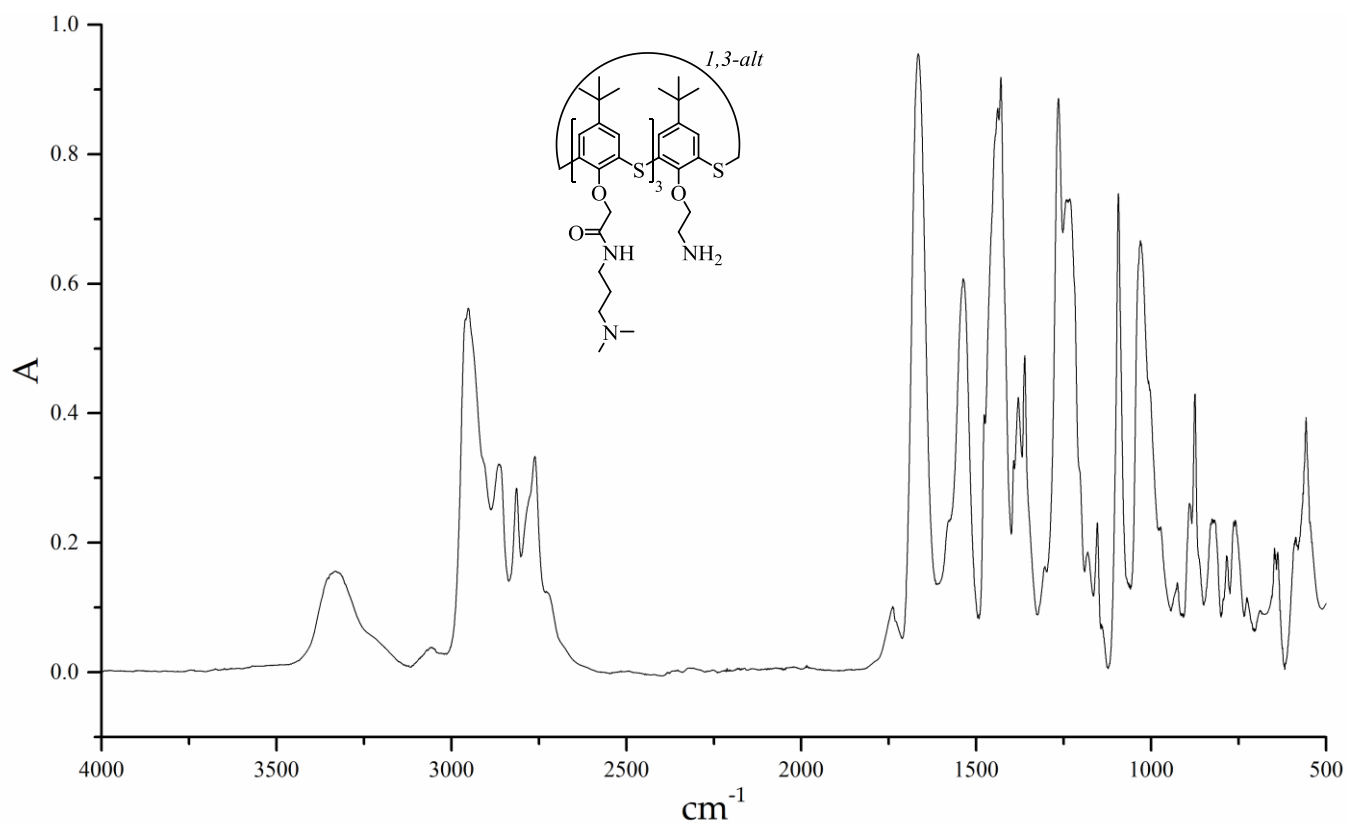

Figures S21. FT-IR spectrum of the compound **4a**

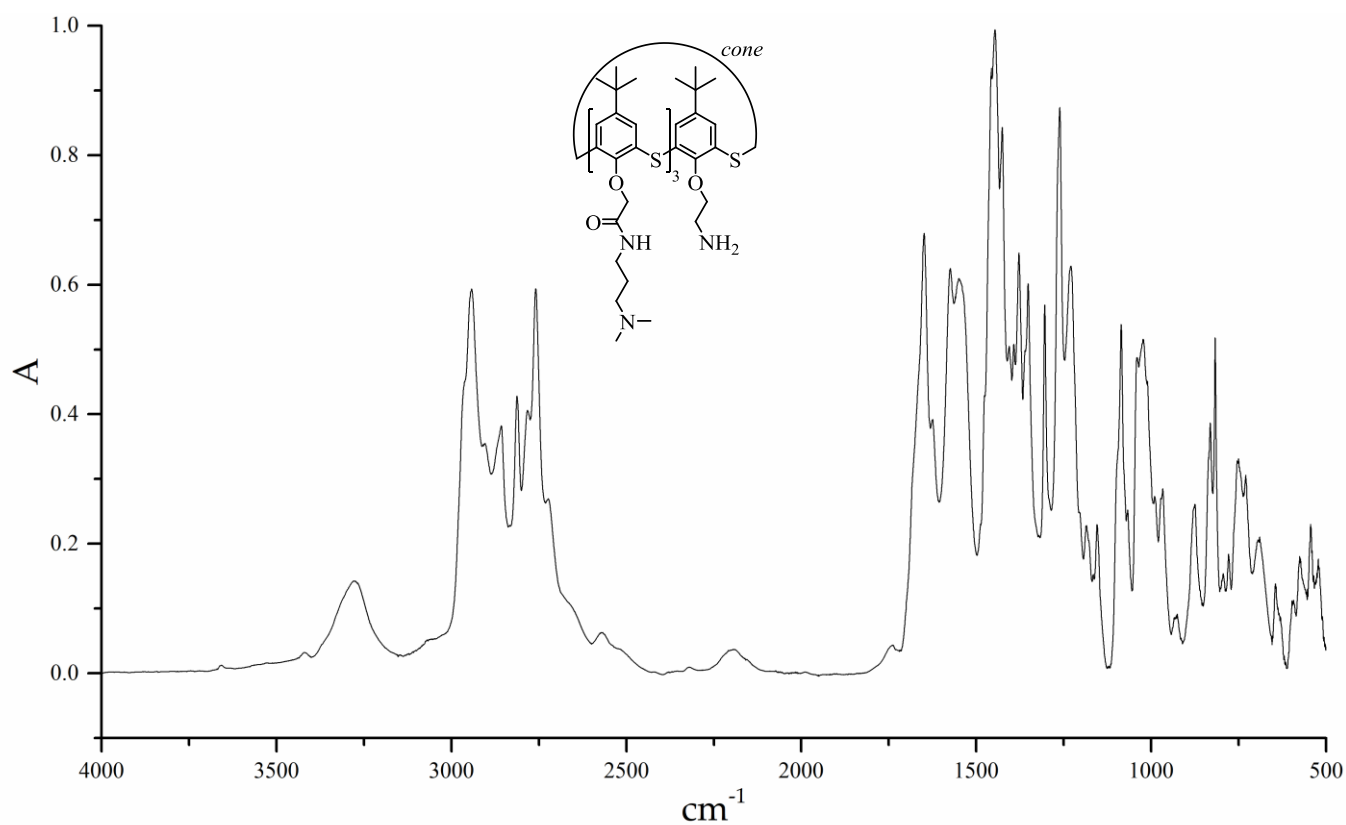

Figures S22. FT-IR spectrum of the compound **4b**

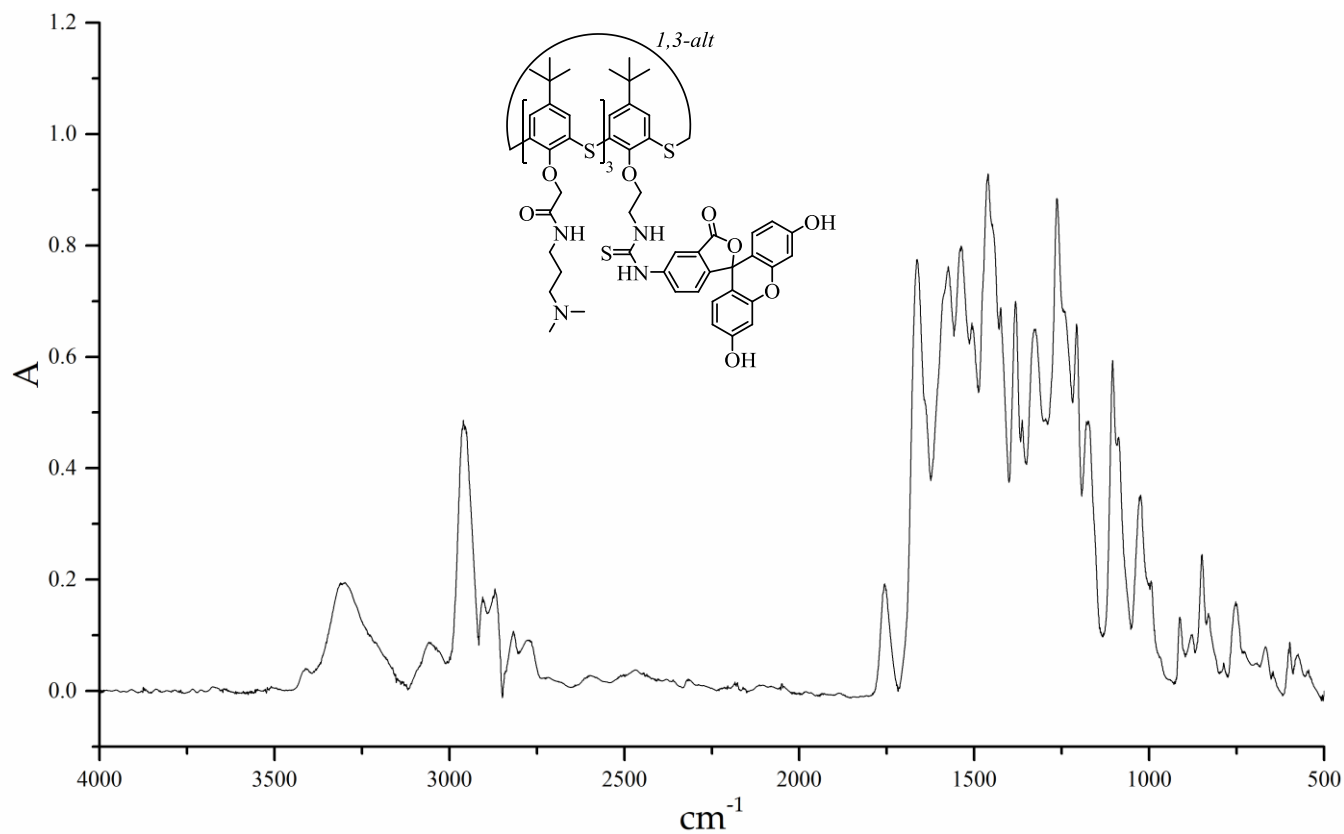

Figures S23. FT-IR spectrum of the compound **5a**

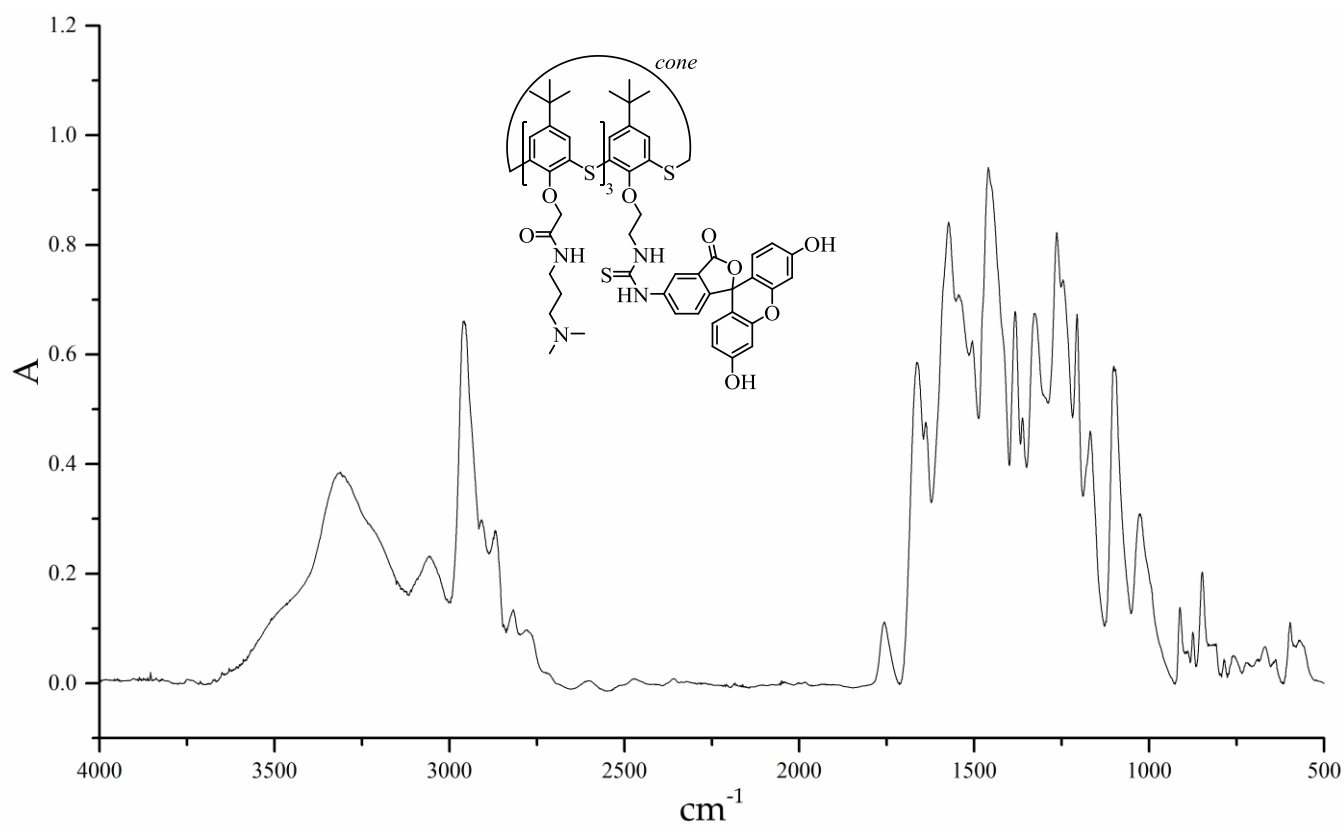

Figures S24. FT-IR spectrum of the compound **5b**



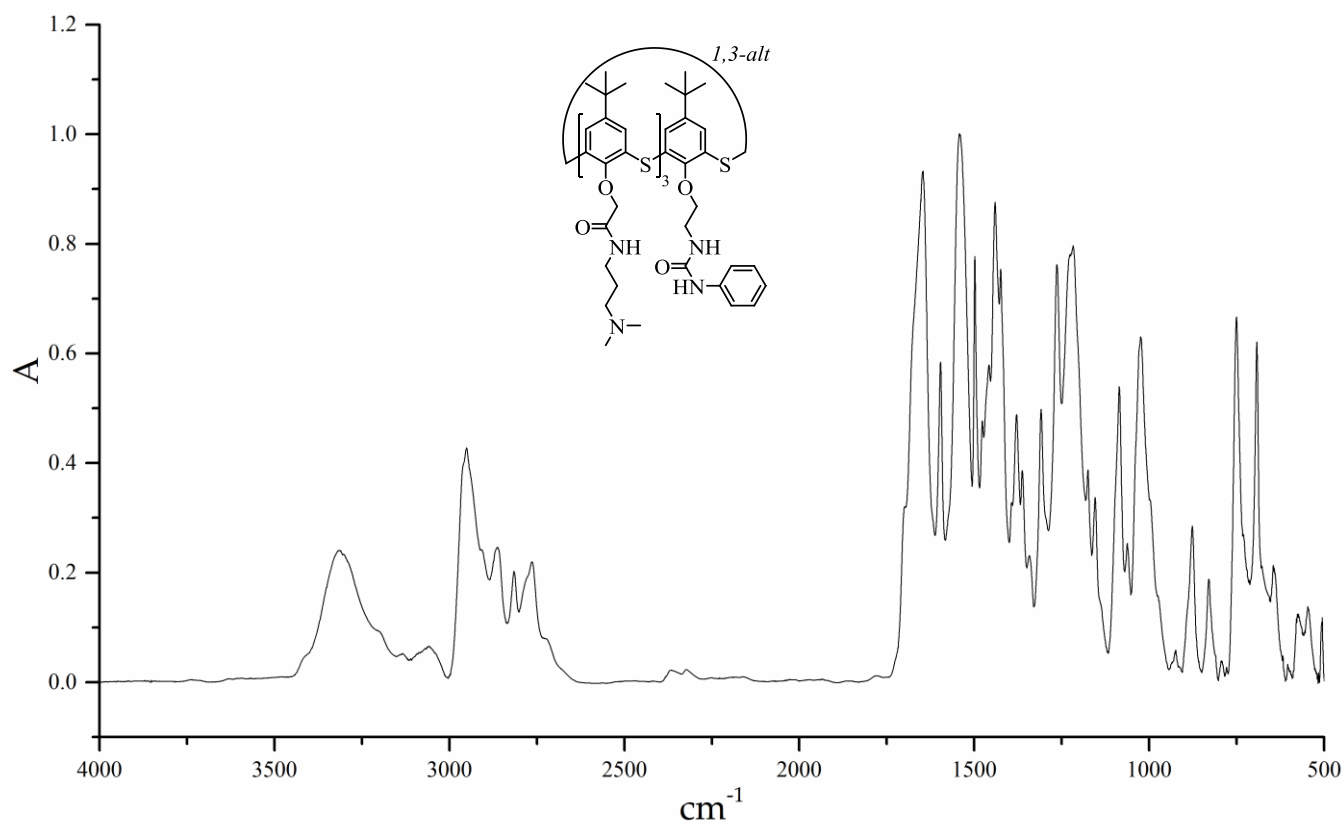

Figures S25. FT-IR spectrum of the compound **5c**

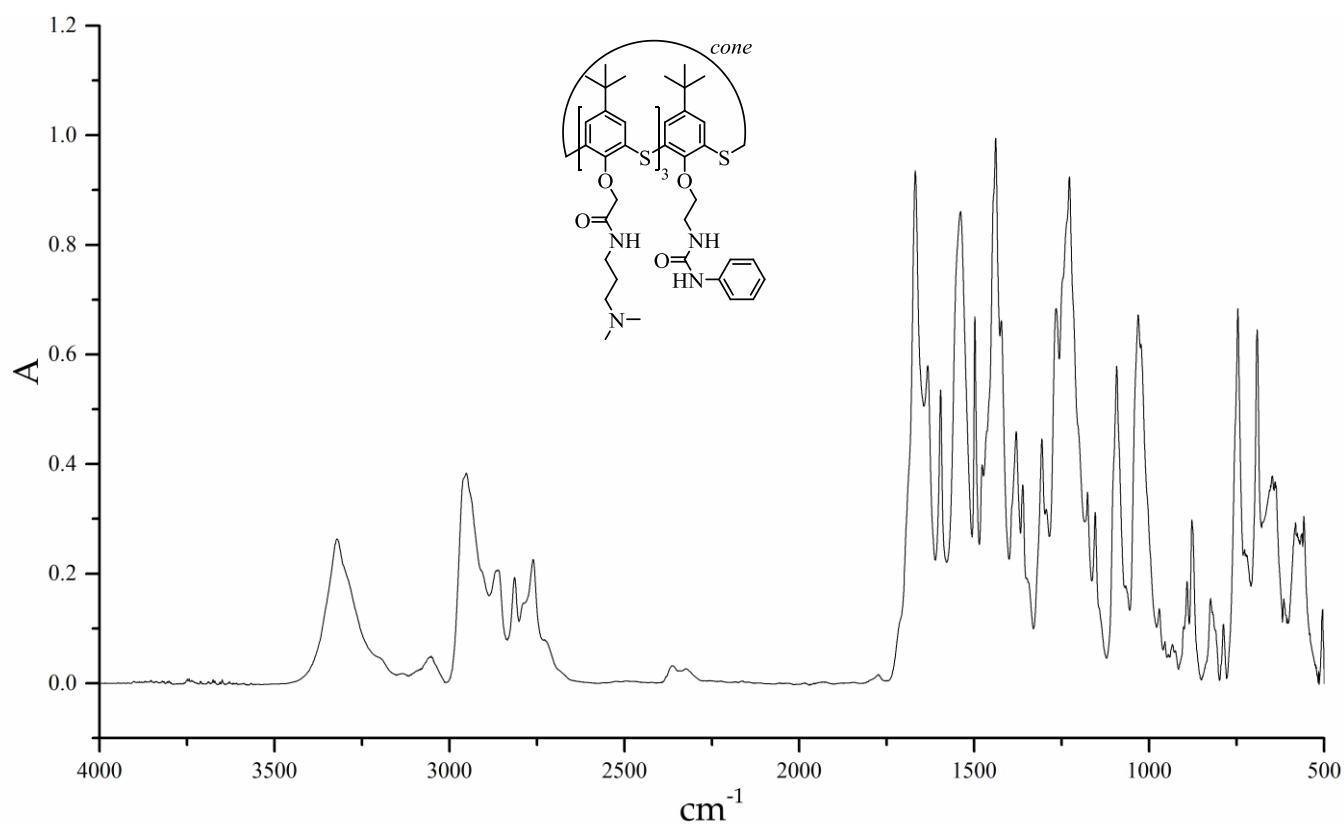

Figures S26. FT-IR spectrum of the compound **5d**

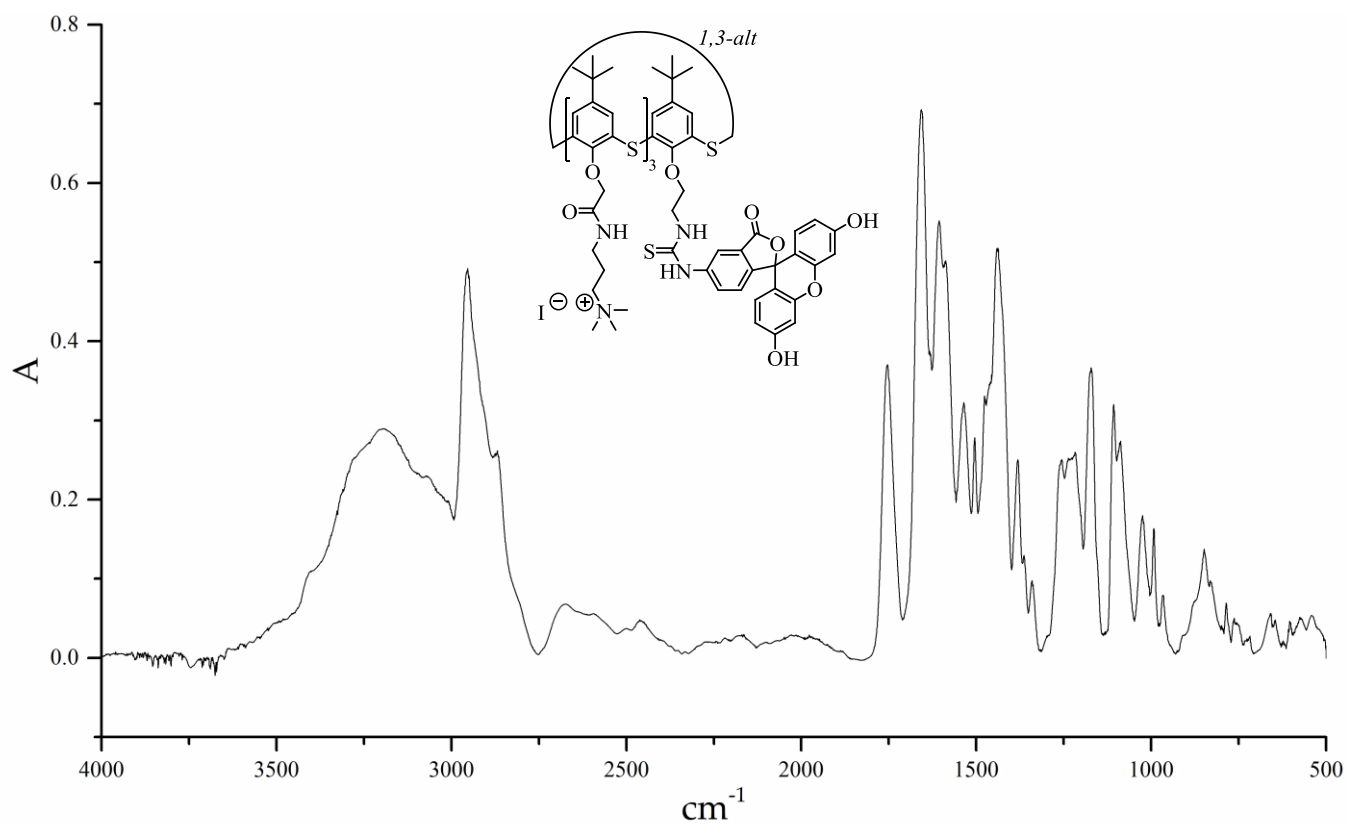

Figures S27. FT-IR spectrum of the compound **6a**

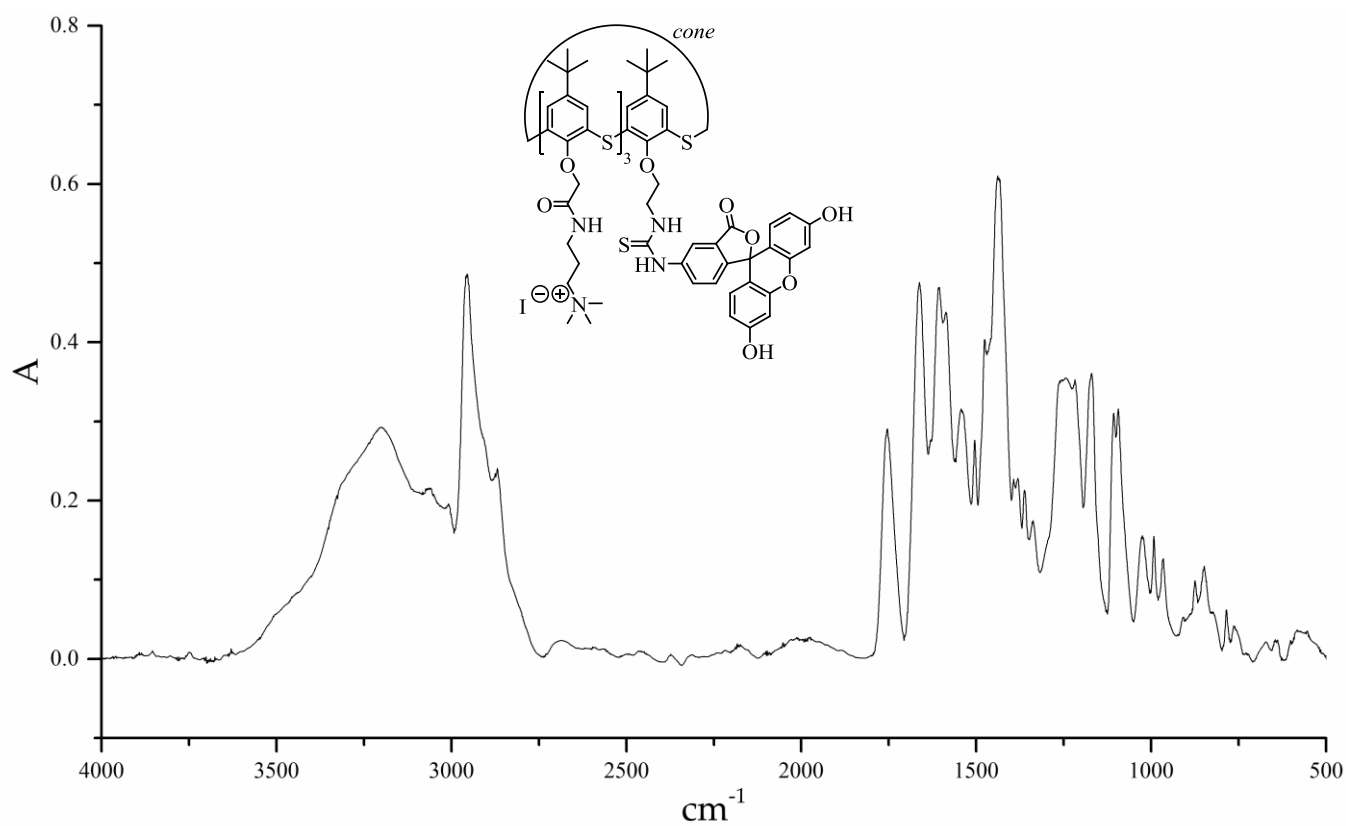

Figures S28. FT-IR spectrum of the compound **6b**

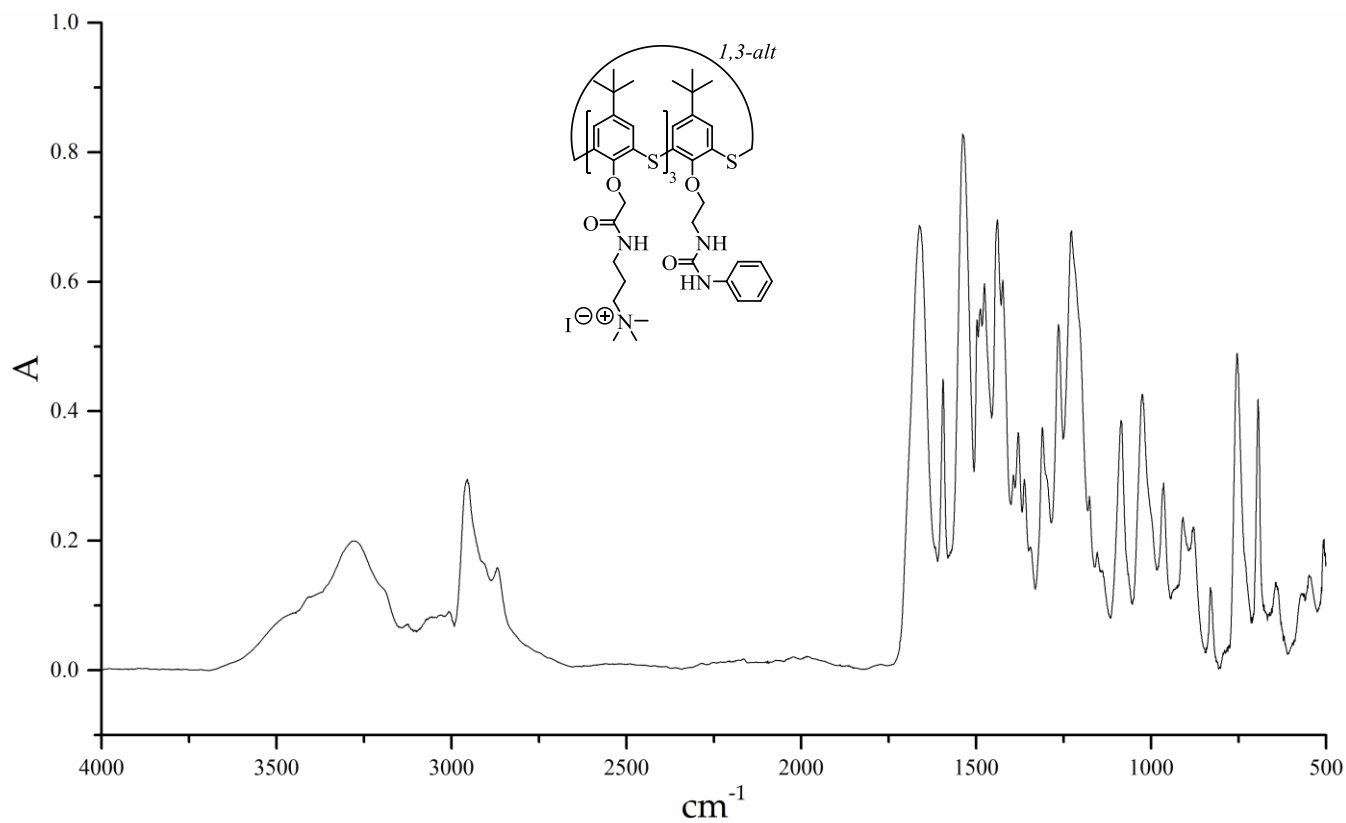

Figures S29. FT-IR spectrum of the compound **6c**

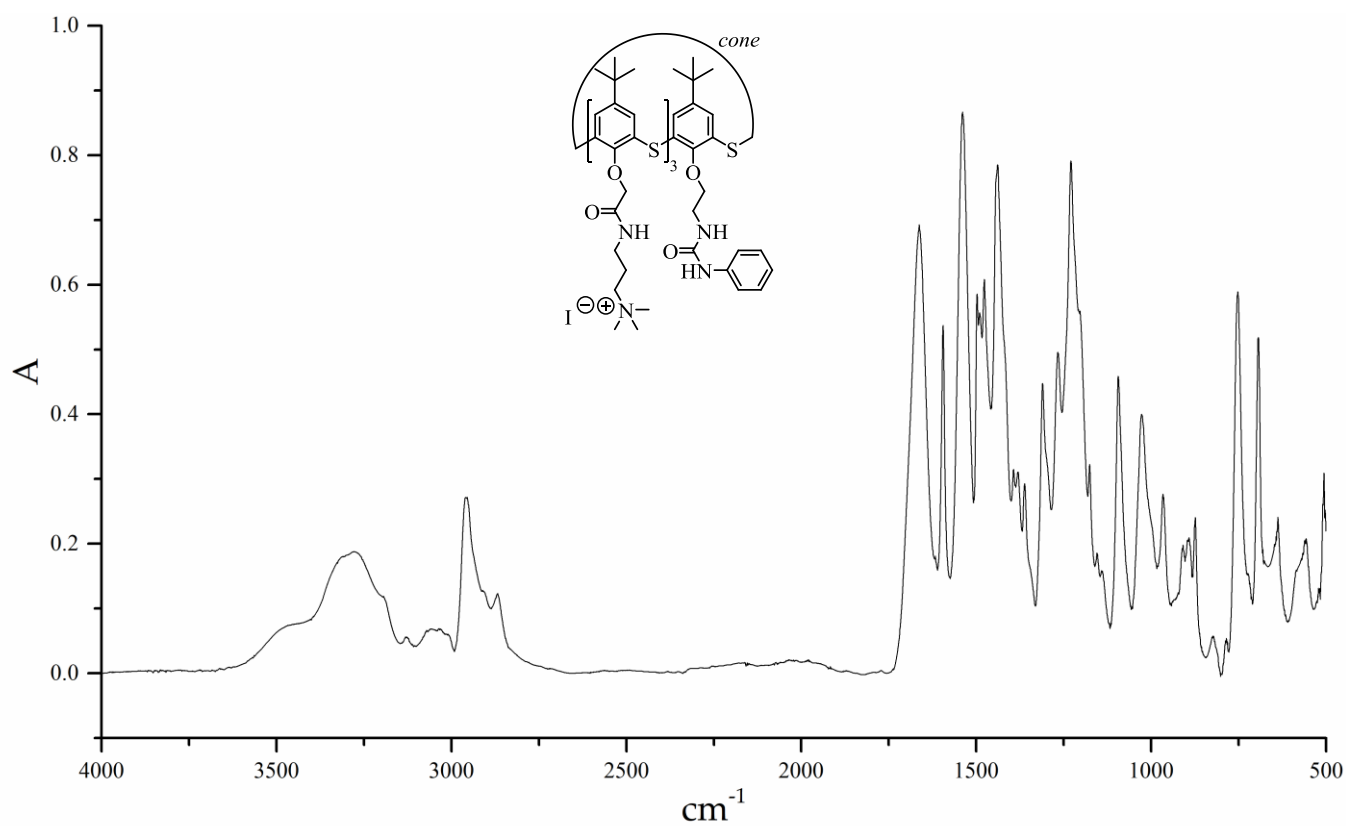

Figures S30. FT-IR spectrum of the compound **6d**

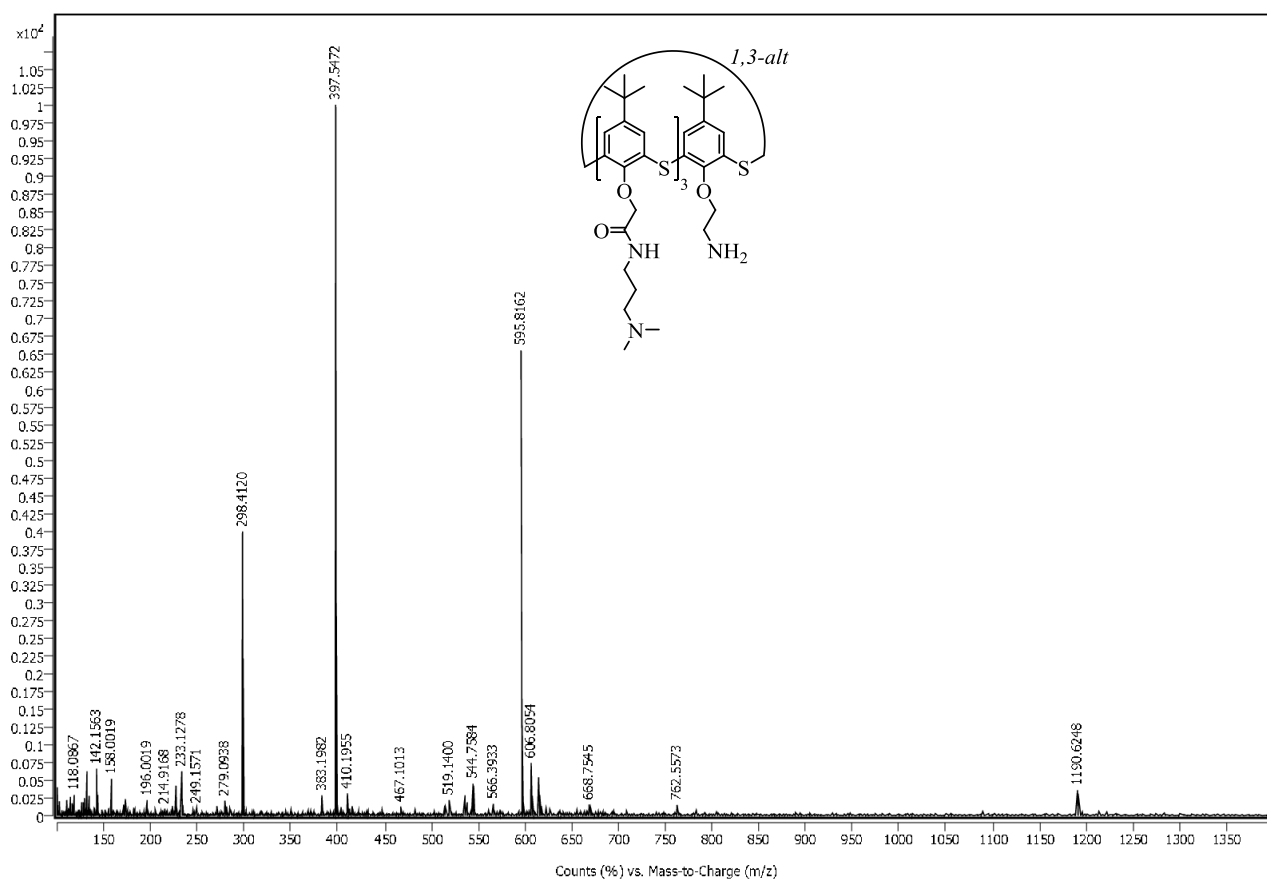

Figures S31. HRMS spectrum of the compound **4a**

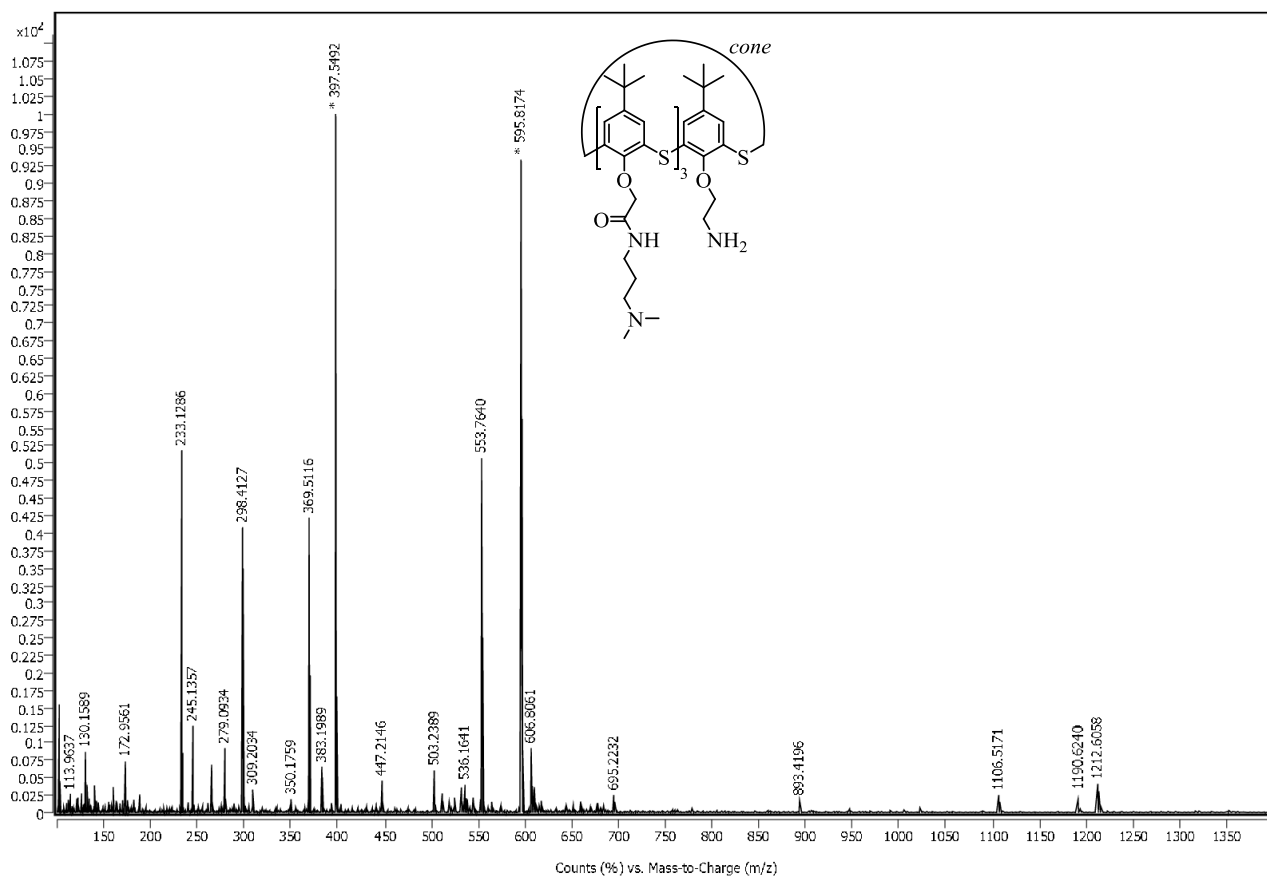

Figures S32. HRMS spectrum of the compound **4b**

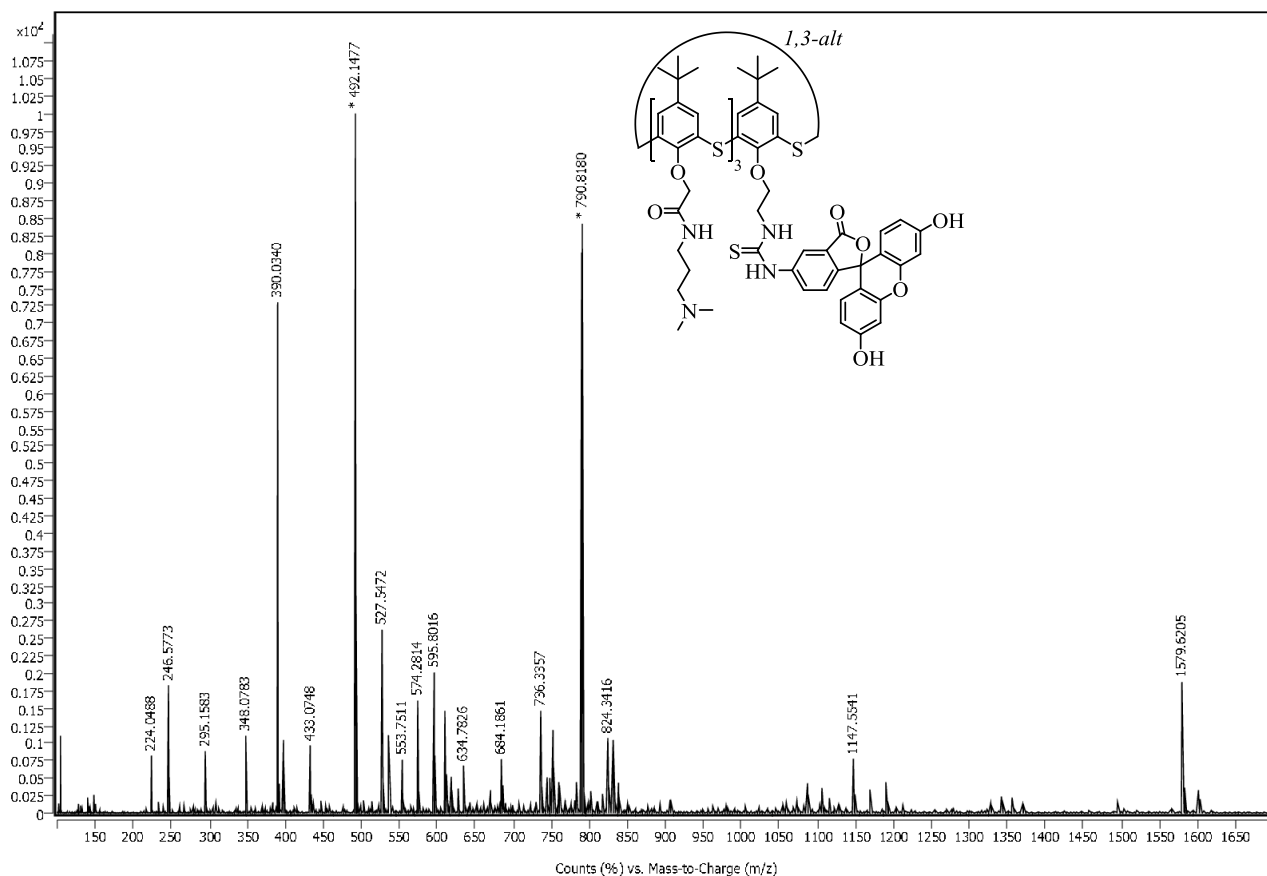

Figures S33. HRMS spectrum of the compound **5a**

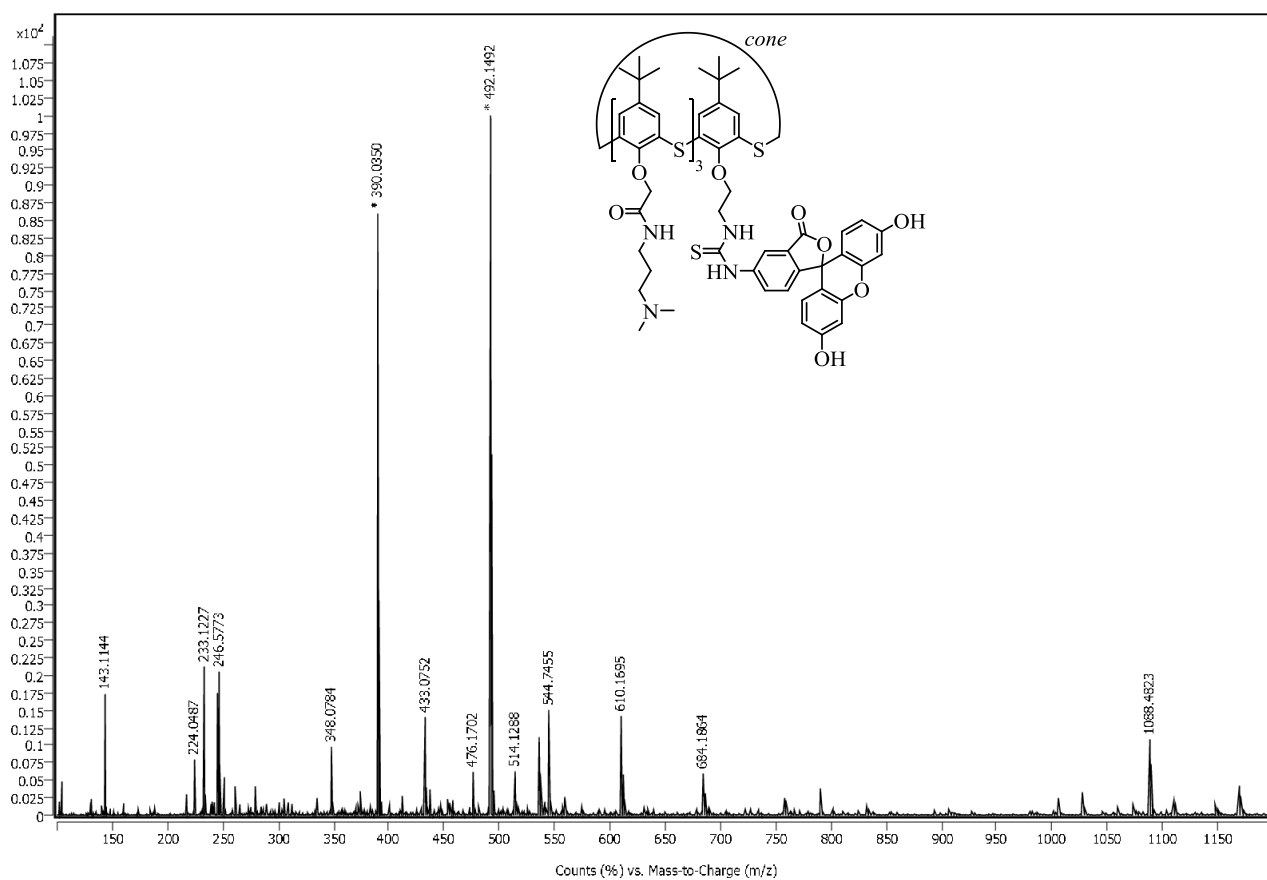

Figures S34. HRMS spectrum of the compound **5b**

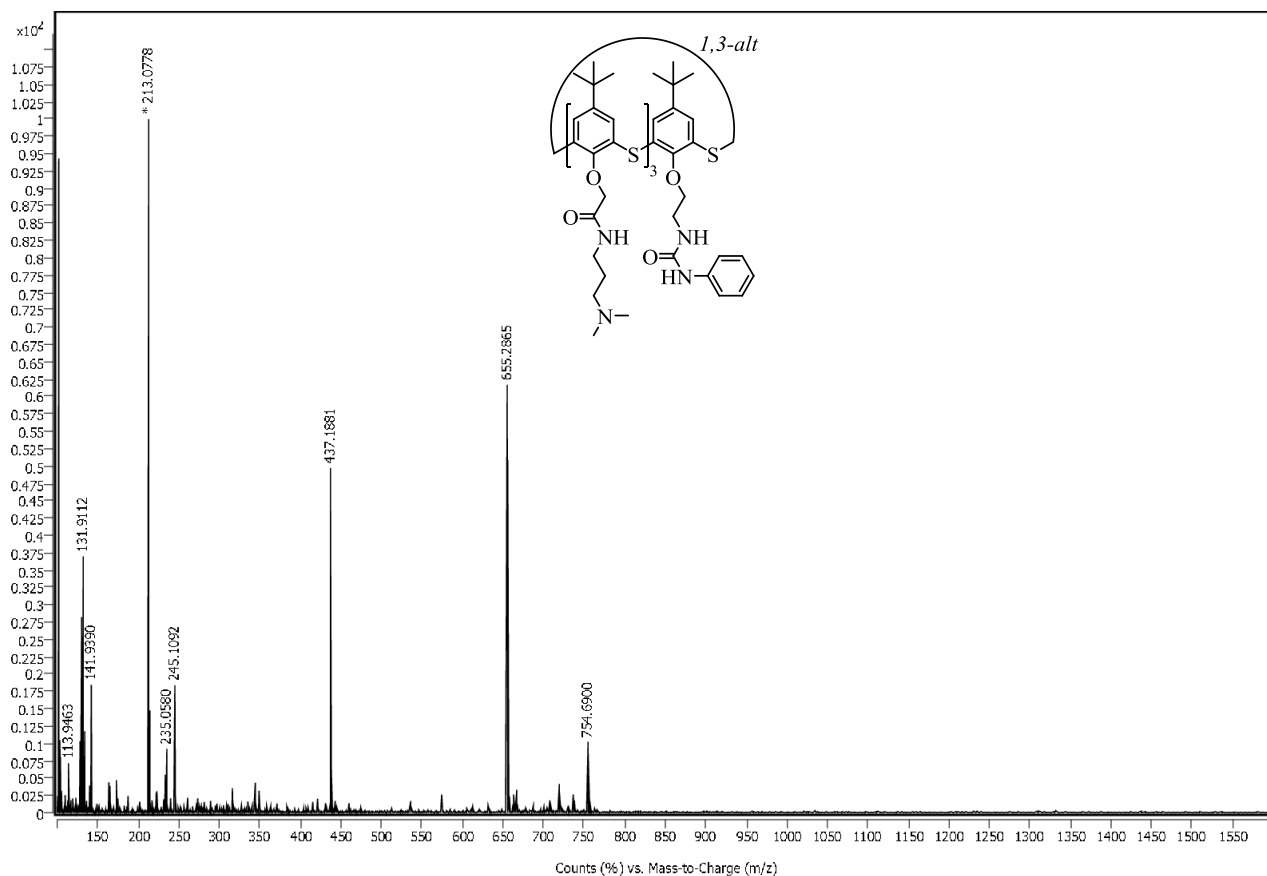

Figures S35. HRMS spectrum of the compound **5c**

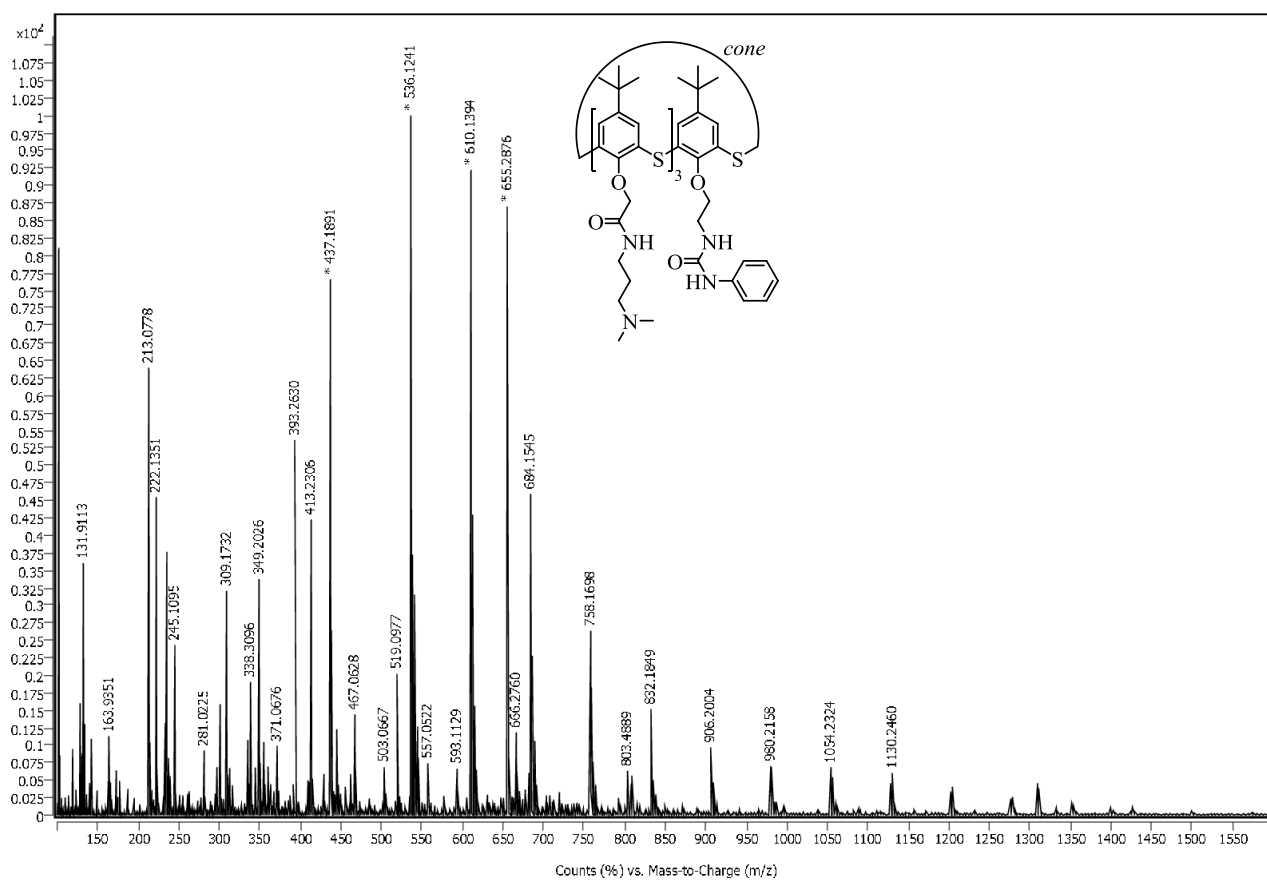

Figures S36. HRMS spectrum of the compound **5d**

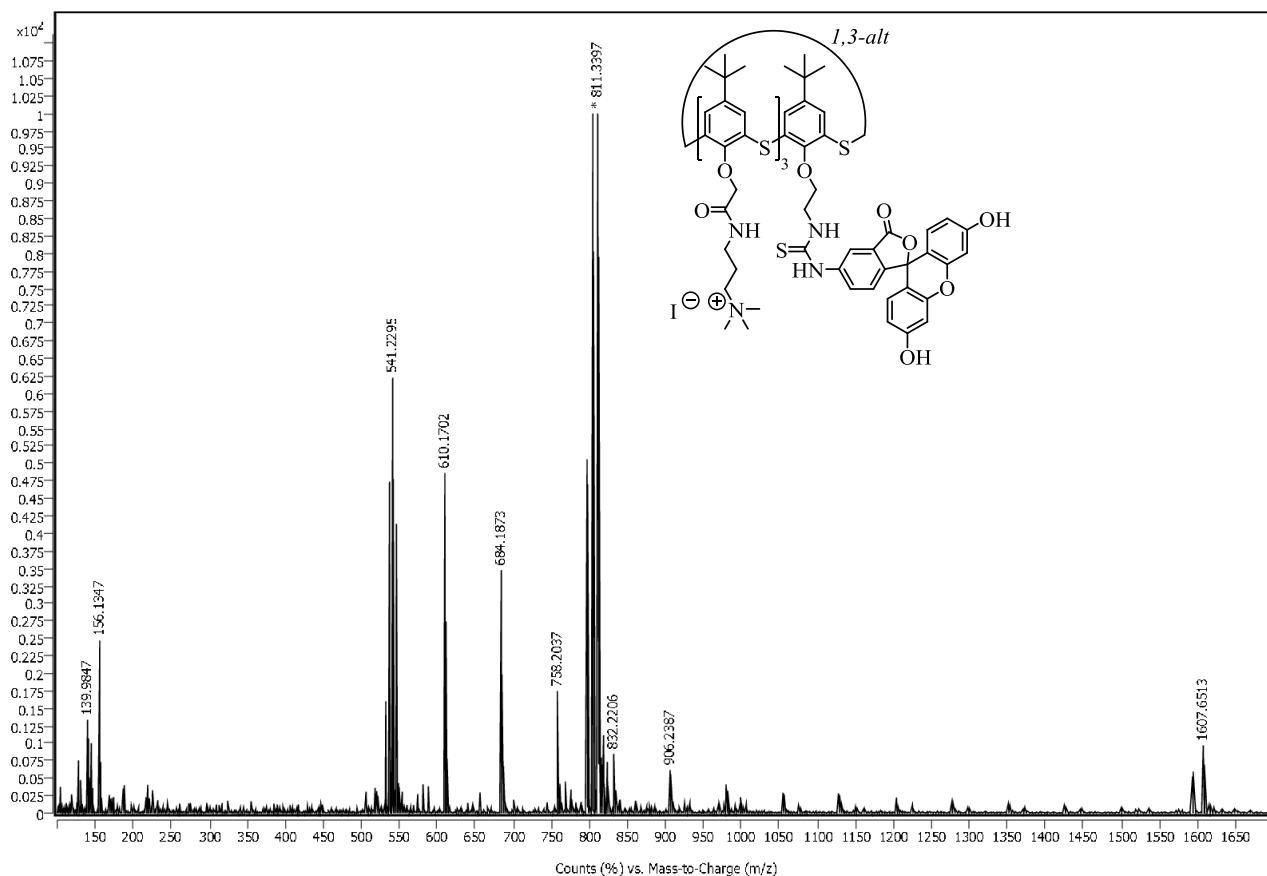

Figures S37. HRMS spectrum of the compound **6a**

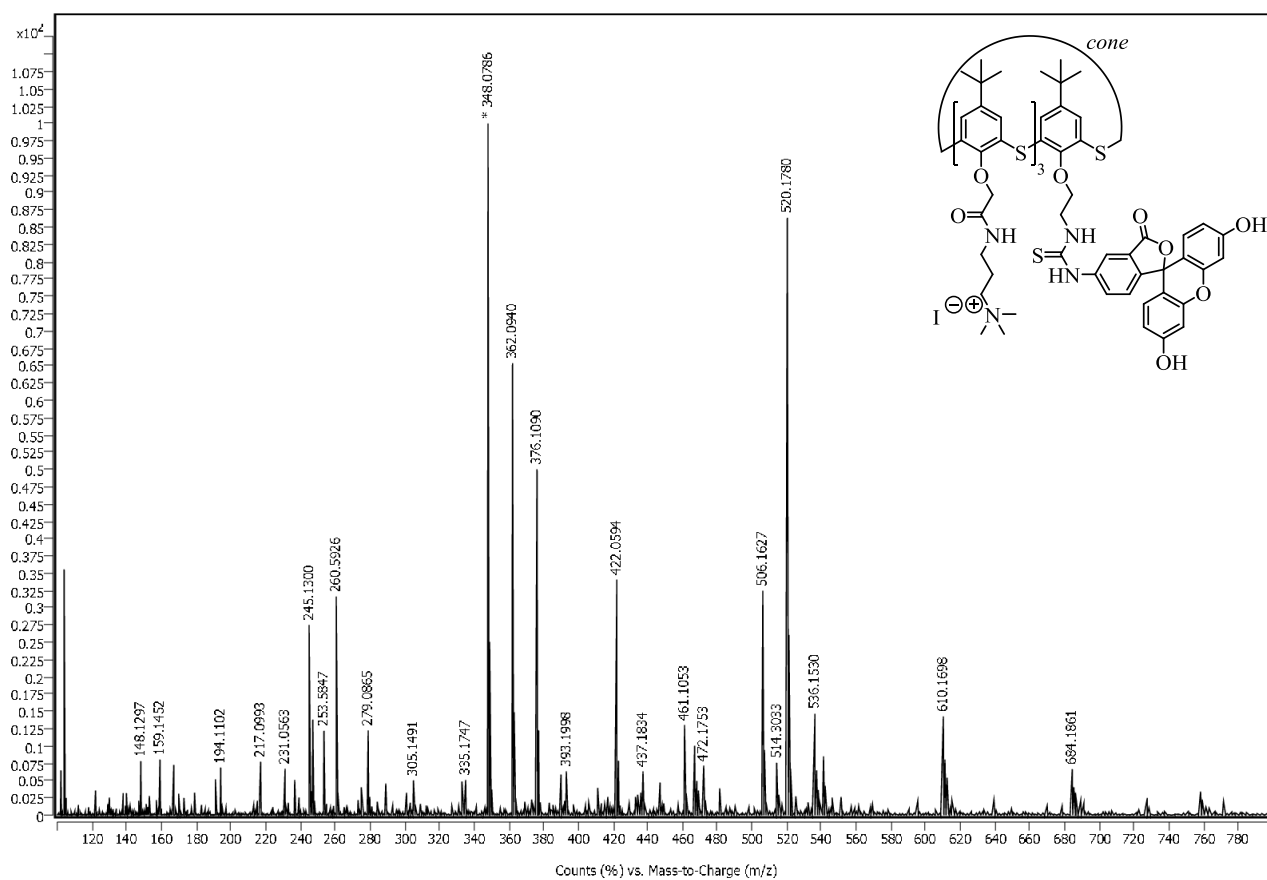

Figures S38. HRMS spectrum of the compound **6b**

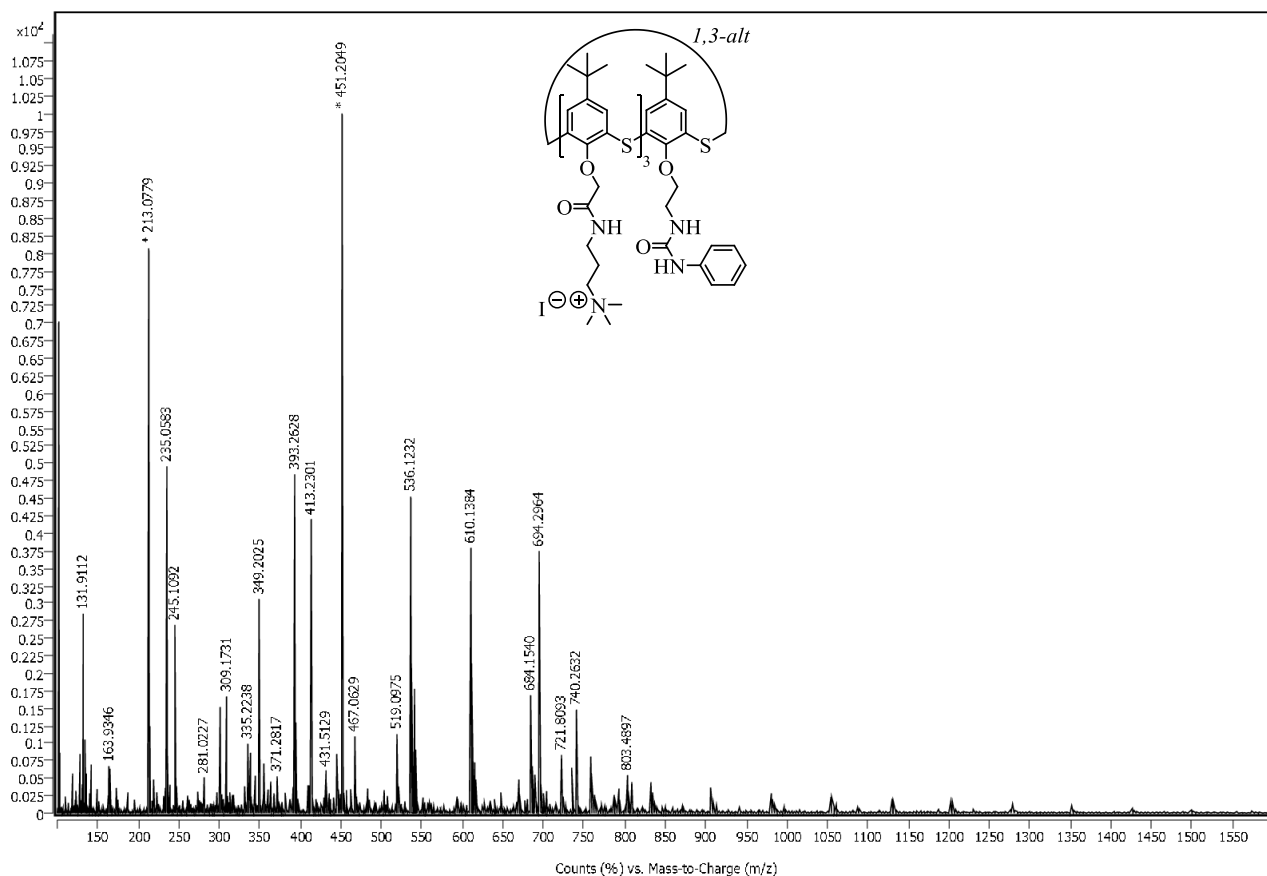

Figures S39. HRMS spectrum of the compound **6c**

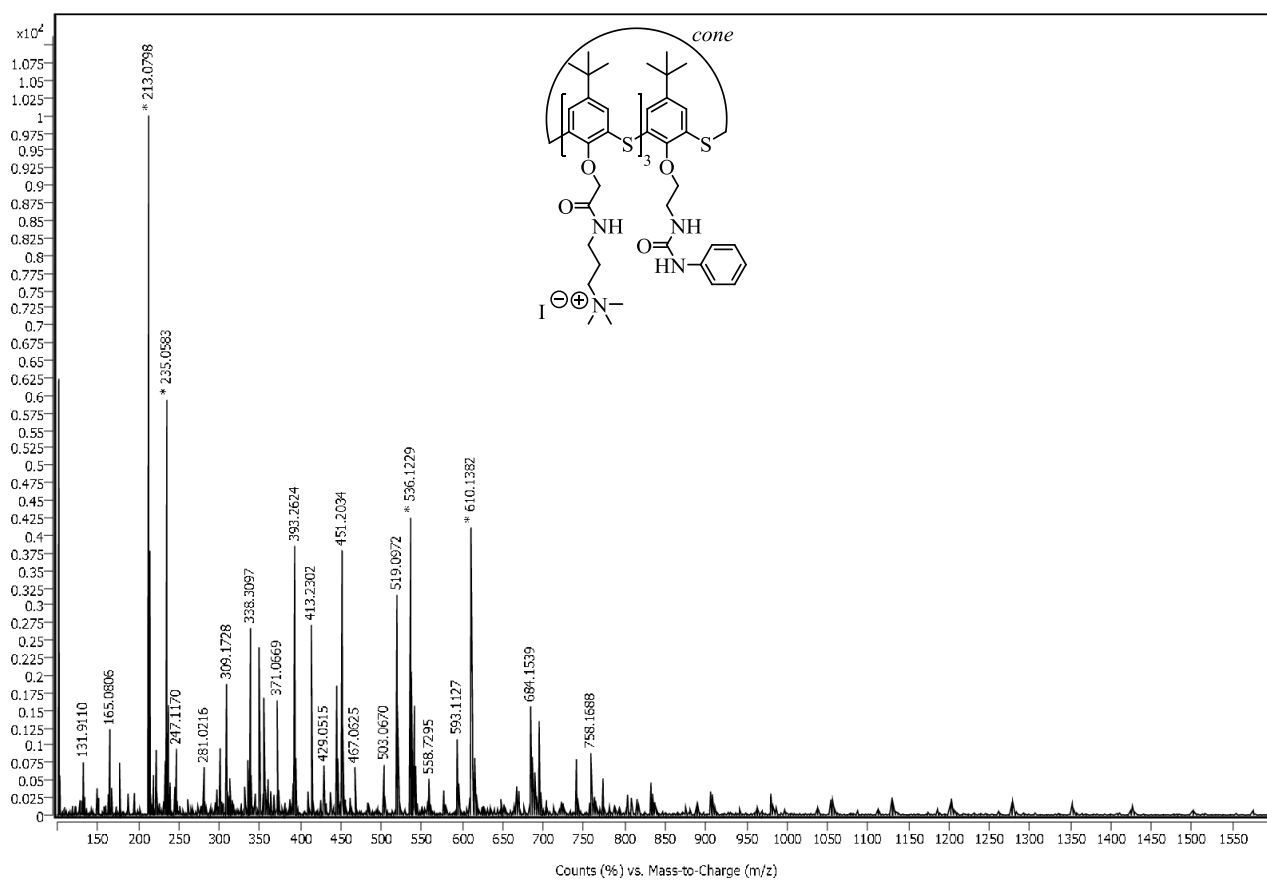

Figures S40. HRMS spectrum of the compound **6d**



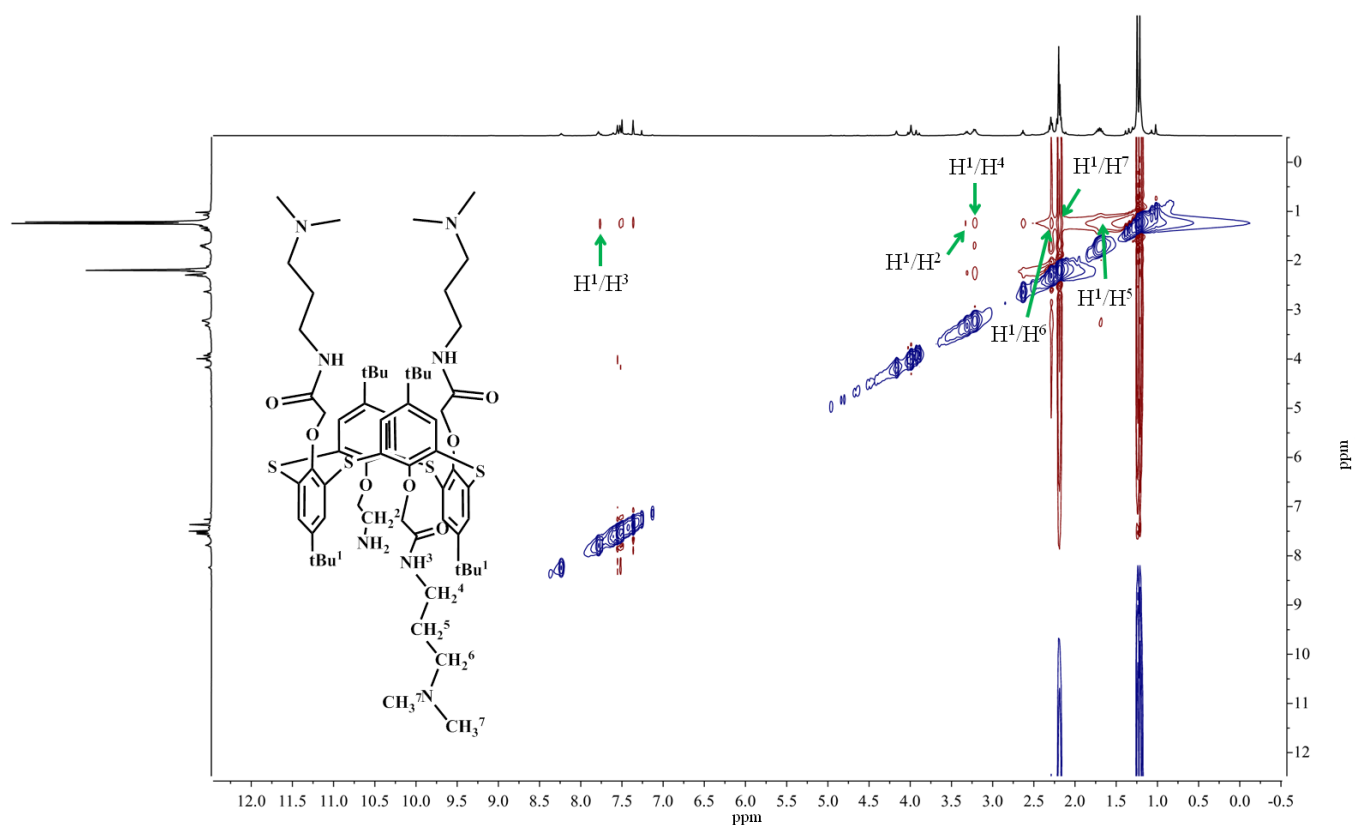

Figures S41. <sup>1</sup>H-<sup>1</sup>H NOESY spectrum of the compound **4a**

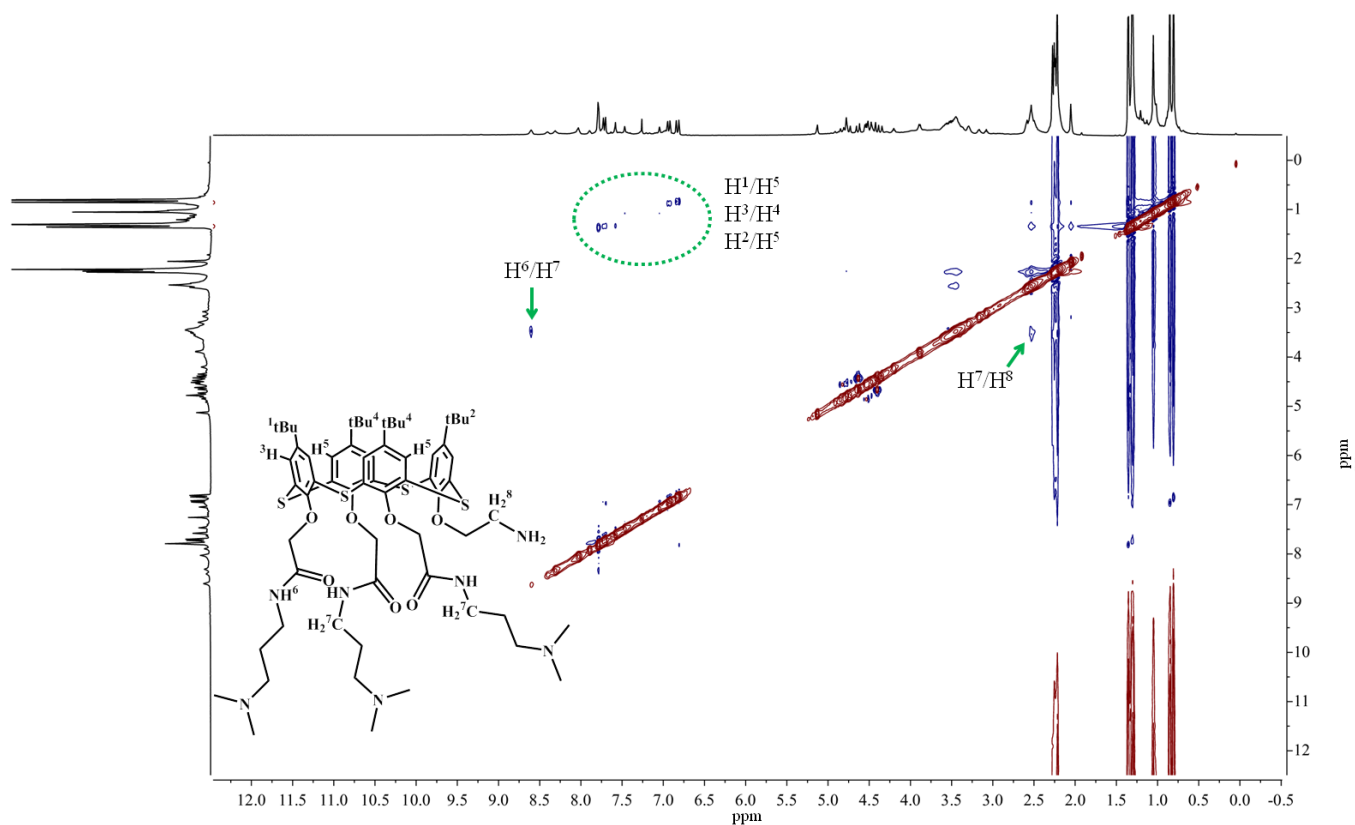

Figures S42. <sup>1</sup>H-<sup>1</sup>H NOESY spectrum of the compound **4b**
